# Supplementary material
Source: PubMed Central journal article supplement (PMC4012575)
Supplement: supp_pp.114.235903_235903Magnani-TableS2.pdf [file supp_pp.114.235903_235903Magnani-TableS2.pdf]

|                                                                   | Term                                                                                                    | Count   | P-value | List Total | Pop Hits | Pop Total | Fold Enrichment | Bonferroni | Benjamini | FDR     |
|-------------------------------------------------------------------|---------------------------------------------------------------------------------------------------------|---------|---------|------------|----------|-----------|-----------------|------------|-----------|---------|
| <i>Arabidopsis thaliana</i>                                       | GO:0045449~regulation of transcription                                                                  | 76      | 3.5E-57 | 81         | 2024     | 13998     | 6.49            | 8.4E-55    | 8.4E-55   | 4.5E-54 |
|                                                                   | GO:0006350~transcription                                                                                | 55      | 7.0E-37 | 81         | 1311     | 13998     | 7.25            | 1.7E-34    | 8.3E-35   | 9.0E-34 |
|                                                                   | GO:0006355~regulation of transcription, DNA-dependent                                                   | 40      | 1.3E-22 | 81         | 1089     | 13998     | 6.35            | 3.0E-20    | 9.9E-21   | 1.6E-19 |
|                                                                   | GO:0051252~regulation of RNA metabolic process                                                          | 40      | 1.5E-22 | 81         | 1095     | 13998     | 6.31            | 3.6E-20    | 9.1E-21   | 2.0E-19 |
|                                                                   | GO:0009791~post-embryonic development                                                                   | 12      | 8.8E-03 | 81         | 851      | 13998     | 2.44            | 8.8E-01    | 1.0E-01   | 1.1E+01 |
|                                                                   | GO:0009651~response to salt stress                                                                      | 8       | 5.1E-03 | 81         | 369      | 13998     | 3.75            | 7.0E-01    | 8.3E-02   | 6.4E+00 |
|                                                                   | GO:0006970~response to osmotic stress                                                                   | 8       | 7.7E-03 | 81         | 399      | 13998     | 3.46            | 8.4E-01    | 9.7E-02   | 9.5E+00 |
|                                                                   | GO:0009908~flower development                                                                           | 7       | 2.1E-03 | 81         | 232      | 13998     | 5.21            | 3.9E-01    | 6.9E-02   | 2.7E+00 |
|                                                                   | GO:0048569~post-embryonic organ development                                                             | 6       | 3.5E-03 | 81         | 178      | 13998     | 5.83            | 5.7E-01    | 8.0E-02   | 4.4E+00 |
|                                                                   | GO:0048467~gynoecium development                                                                        | 5       | 2.7E-04 | 81         | 55       | 13998     | 15.71           | 6.2E-02    | 1.3E-02   | 3.5E-01 |
|                                                                   | GO:0003002~regionalization                                                                              | 5       | 1.8E-03 | 81         | 91       | 13998     | 9.50            | 3.5E-01    | 6.9E-02   | 2.3E+00 |
|                                                                   | GO:0048438~floral whorl development                                                                     | 5       | 3.2E-03 | 81         | 106      | 13998     | 8.15            | 5.3E-01    | 8.0E-02   | 4.0E+00 |
|                                                                   | GO:0007389~pattern specification process                                                                | 5       | 3.7E-03 | 81         | 111      | 13998     | 7.78            | 5.9E-01    | 7.8E-02   | 4.7E+00 |
|                                                                   | GO:0048440~carpel development                                                                           | 4       | 2.7E-03 | 81         | 49       | 13998     | 14.11           | 4.8E-01    | 7.8E-02   | 3.5E+00 |
|                                                                   | GO:0045941~positive regulation of transcription                                                         | 4       | 3.8E-03 | 81         | 55       | 13998     | 12.57           | 6.0E-01    | 7.3E-02   | 4.8E+00 |
|                                                                   | GO:0010628~positive regulation of gene expression                                                       | 4       | 4.0E-03 | 81         | 56       | 13998     | 12.34           | 6.2E-01    | 7.1E-02   | 5.0E+00 |
|                                                                   | GO:0045935~positive regulation of nucleobase, nucleoside, nucleotide and nucleic acid metabolic process | 4       | 5.6E-03 | 81         | 63       | 13998     | 10.97           | 7.4E-01    | 8.5E-02   | 7.0E+00 |
|                                                                   | GO:0051173~positive regulation of nitrogen compound metabolic process                                   | 4       | 5.6E-03 | 81         | 63       | 13998     | 10.97           | 7.4E-01    | 8.5E-02   | 7.0E+00 |
|                                                                   | GO:0010557~positive regulation of macromolecule biosynthetic process                                    | 4       | 5.6E-03 | 81         | 63       | 13998     | 10.97           | 7.4E-01    | 8.5E-02   | 7.0E+00 |
|                                                                   | GO:0009891~positive regulation of biosynthetic process                                                  | 4       | 6.9E-03 | 81         | 68       | 13998     | 10.17           | 8.1E-01    | 9.8E-02   | 8.5E+00 |
| GO:0031328~positive regulation of cellular biosynthetic process   | 4                                                                                                       | 6.9E-03 | 81      | 68         | 13998    | 10.17     | 8.1E-01         | 9.8E-02    | 8.5E+00   |         |
| GO:0010604~positive regulation of macromolecule metabolic process | 4                                                                                                       | 7.2E-03 | 81      | 69         | 13998    | 10.02     | 8.2E-01         | 9.6E-02    | 8.9E+00   |         |
| <i>Drosophila melanogaster</i>                                    | GO:0045449~regulation of transcription                                                                  | 18      | 9.6E-18 | 18         | 799      | 7937      | 9.93            | 4.1E-15    | 4.1E-15   | 1.4E-14 |
|                                                                   | GO:0006355~regulation of transcription, DNA-dependent                                                   | 14      | 5.4E-12 | 18         | 612      | 7937      | 10.09           | 2.3E-09    | 1.2E-09   | 7.6E-09 |
|                                                                   | GO:0051252~regulation of RNA metabolic process                                                          | 14      | 2.0E-11 | 18         | 678      | 7937      | 9.11            | 8.6E-09    | 2.9E-09   | 2.8E-08 |
|                                                                   | GO:0006350~transcription                                                                                | 10      | 1.1E-07 | 18         | 459      | 7937      | 9.61            | 4.6E-05    | 1.2E-05   | 1.5E-04 |
|                                                                   | GO:0030182~neuron differentiation                                                                       | 8       | 1.1E-05 | 18         | 409      | 7937      | 8.62            | 4.9E-03    | 9.7E-04   | 1.6E-02 |
|                                                                   | GO:0002165~instar larval or pupal development                                                           | 7       | 1.5E-04 | 18         | 418      | 7937      | 7.38            | 6.4E-02    | 1.1E-02   | 2.2E-01 |

|                     |                                                                                                         |    |         |    |      |       |       |         |         |         |
|---------------------|---------------------------------------------------------------------------------------------------------|----|---------|----|------|-------|-------|---------|---------|---------|
|                     | GO:0009791~post-embryonic development                                                                   | 7  | 1.9E-04 | 18 | 434  | 7937  | 7.11  | 7.9E-02 | 1.2E-02 | 2.7E-01 |
|                     | GO:0007548~sex differentiation                                                                          | 4  | 2.6E-04 | 18 | 60   | 7937  | 29.40 | 1.1E-01 | 1.4E-02 | 3.6E-01 |
|                     | GO:0007552~metamorphosis                                                                                | 6  | 7.5E-04 | 18 | 362  | 7937  | 7.31  | 2.8E-01 | 3.5E-02 | 1.1E+00 |
|                     | GO:0045165~cell fate commitment                                                                         | 5  | 1.3E-03 | 18 | 232  | 7937  | 9.50  | 4.2E-01 | 5.2E-02 | 1.8E+00 |
|                     | GO:0001751~compound eye photoreceptor cell differentiation                                              | 4  | 1.6E-03 | 18 | 111  | 7937  | 15.89 | 4.9E-01 | 5.9E-02 | 2.2E+00 |
|                     | GO:0001754~eye photoreceptor cell differentiation                                                       | 4  | 1.8E-03 | 18 | 116  | 7937  | 15.20 | 5.3E-01 | 6.2E-02 | 2.5E+00 |
|                     | GO:0048813~dendrite morphogenesis                                                                       | 4  | 1.8E-03 | 18 | 117  | 7937  | 15.08 | 5.4E-01 | 5.9E-02 | 2.5E+00 |
|                     | GO:0016358~dendrite development                                                                         | 4  | 1.8E-03 | 18 | 117  | 7937  | 15.08 | 5.4E-01 | 5.9E-02 | 2.5E+00 |
|                     | GO:0000902~cell morphogenesis                                                                           | 6  | 1.9E-03 | 18 | 442  | 7937  | 5.99  | 5.5E-01 | 5.5E-02 | 2.6E+00 |
|                     | GO:0046530~photoreceptor cell differentiation                                                           | 4  | 2.4E-03 | 18 | 128  | 7937  | 13.78 | 6.4E-01 | 6.5E-02 | 3.3E+00 |
|                     | GO:0045137~development of primary sexual characteristics                                                | 3  | 2.6E-03 | 18 | 36   | 7937  | 36.75 | 6.7E-01 | 6.8E-02 | 3.6E+00 |
|                     | GO:0048812~neuron projection morphogenesis                                                              | 5  | 2.7E-03 | 18 | 286  | 7937  | 7.71  | 6.9E-01 | 6.6E-02 | 3.8E+00 |
|                     | GO:0031175~neuron projection development                                                                | 5  | 2.7E-03 | 18 | 287  | 7937  | 7.68  | 6.9E-01 | 6.3E-02 | 3.8E+00 |
|                     | GO:0048667~cell morphogenesis involved in neuron differentiation                                        | 5  | 2.8E-03 | 18 | 288  | 7937  | 7.66  | 7.0E-01 | 6.1E-02 | 3.8E+00 |
|                     | GO:0000904~cell morphogenesis involved in differentiation                                               | 5  | 3.3E-03 | 18 | 303  | 7937  | 7.28  | 7.6E-01 | 6.9E-02 | 4.6E+00 |
|                     | GO:0003006~reproductive developmental process                                                           | 6  | 3.4E-03 | 18 | 506  | 7937  | 5.23  | 7.6E-01 | 6.6E-02 | 4.6E+00 |
|                     | GO:0032989~cellular component morphogenesis                                                             | 6  | 3.7E-03 | 18 | 518  | 7937  | 5.11  | 8.0E-01 | 7.0E-02 | 5.1E+00 |
|                     | GO:0048858~cell projection morphogenesis                                                                | 5  | 4.1E-03 | 18 | 320  | 7937  | 6.89  | 8.3E-01 | 7.3E-02 | 5.6E+00 |
|                     | GO:0032990~cell part morphogenesis                                                                      | 5  | 4.6E-03 | 18 | 331  | 7937  | 6.66  | 8.6E-01 | 7.9E-02 | 6.3E+00 |
|                     | GO:0048707~instar larval or pupal morphogenesis                                                         | 5  | 5.4E-03 | 18 | 347  | 7937  | 6.35  | 9.0E-01 | 8.9E-02 | 7.4E+00 |
|                     | GO:0048666~neuron development                                                                           | 5  | 5.4E-03 | 18 | 347  | 7937  | 6.35  | 9.0E-01 | 8.9E-02 | 7.4E+00 |
|                     | GO:0009886~post-embryonic morphogenesis                                                                 | 5  | 5.8E-03 | 18 | 353  | 7937  | 6.25  | 9.2E-01 | 9.1E-02 | 7.8E+00 |
|                     | GO:0030030~cell projection organization                                                                 | 5  | 6.5E-03 | 18 | 365  | 7937  | 6.04  | 9.4E-01 | 9.8E-02 | 8.8E+00 |
|                     | GO:0051146~striated muscle cell differentiation                                                         | 3  | 8.3E-03 | 18 | 65   | 7937  | 20.35 | 9.7E-01 | 1.2E-01 | 1.1E+01 |
|                     | GO:0007423~sensory organ development                                                                    | 5  | 9.8E-03 | 18 | 410  | 7937  | 5.38  | 9.9E-01 | 1.4E-01 | 1.3E+01 |
|                     |                                                                                                         |    |         |    |      |       |       |         |         |         |
| <b>Mus musculus</b> | GO:0045449~regulation of transcription                                                                  | 29 | 2.7E-20 | 31 | 2227 | 13588 | 5.71  | 6.0E-18 | 6.0E-18 | 3.4E-17 |
|                     | GO:0006355~regulation of transcription, DNA-dependent                                                   | 21 | 4.1E-13 | 31 | 1465 | 13588 | 6.28  | 9.2E-11 | 4.6E-11 | 5.3E-10 |
|                     | GO:0051252~regulation of RNA metabolic process                                                          | 21 | 5.6E-13 | 31 | 1488 | 13588 | 6.19  | 1.2E-10 | 4.1E-11 | 7.1E-10 |
|                     | GO:0006350~transcription                                                                                | 20 | 1.8E-10 | 31 | 1772 | 13588 | 4.95  | 4.1E-08 | 1.0E-08 | 2.4E-07 |
|                     | GO:0010629~negative regulation of gene expression                                                       | 8  | 2.4E-05 | 31 | 410  | 13588 | 8.55  | 5.3E-03 | 1.1E-03 | 3.1E-02 |
|                     | GO:0010605~negative regulation of macromolecule metabolic process                                       | 8  | 9.2E-05 | 31 | 506  | 13588 | 6.93  | 2.0E-02 | 3.4E-03 | 1.2E-01 |
|                     | GO:0016481~negative regulation of transcription                                                         | 7  | 1.4E-04 | 31 | 372  | 13588 | 8.25  | 3.0E-02 | 4.4E-03 | 1.8E-01 |
|                     | GO:0045934~negative regulation of nucleobase, nucleoside, nucleotide and nucleic acid metabolic process | 7  | 2.0E-04 | 31 | 397  | 13588 | 7.73  | 4.3E-02 | 5.4E-03 | 2.5E-01 |

|                     |                                                                                                         |    |         |    |      |       |       |         |         |         |
|---------------------|---------------------------------------------------------------------------------------------------------|----|---------|----|------|-------|-------|---------|---------|---------|
|                     | GO:0051172~negative regulation of nitrogen compound metabolic process                                   | 7  | 2.1E-04 | 31 | 401  | 13588 | 7.65  | 4.5E-02 | 5.1E-03 | 2.6E-01 |
|                     | GO:0010558~negative regulation of macromolecule biosynthetic process                                    | 7  | 2.6E-04 | 31 | 418  | 13588 | 7.34  | 5.6E-02 | 5.7E-03 | 3.3E-01 |
|                     | GO:0031327~negative regulation of cellular biosynthetic process                                         | 7  | 3.0E-04 | 31 | 430  | 13588 | 7.14  | 6.5E-02 | 6.1E-03 | 3.8E-01 |
|                     | GO:0009890~negative regulation of biosynthetic process                                                  | 7  | 3.2E-04 | 31 | 434  | 13588 | 7.07  | 6.8E-02 | 5.9E-03 | 4.0E-01 |
|                     | GO:0045892~negative regulation of transcription, DNA-dependent                                          | 5  | 4.5E-03 | 31 | 308  | 13588 | 7.12  | 6.3E-01 | 7.3E-02 | 5.5E+00 |
|                     | GO:0051253~negative regulation of RNA metabolic process                                                 | 5  | 4.6E-03 | 31 | 310  | 13588 | 7.07  | 6.4E-01 | 7.0E-02 | 5.7E+00 |
|                     | GO:0010551~regulation of specific transcription from RNA polymerase II promoter                         | 3  | 5.6E-03 | 31 | 51   | 13588 | 25.78 | 7.1E-01 | 8.0E-02 | 6.9E+00 |
|                     | GO:0032583~regulation of gene-specific transcription                                                    | 3  | 9.5E-03 | 31 | 67   | 13588 | 19.63 | 8.8E-01 | 1.2E-01 | 1.1E+01 |
|                     |                                                                                                         |    |         |    |      |       |       |         |         |         |
| <b>Homo sapiens</b> | GO:0045449~regulation of transcription                                                                  | 34 | 1.8E-18 | 40 | 2601 | 13528 | 4.42  | 5.7E-16 | 1.9E-16 | 2.5E-15 |
|                     | GO:0006355~regulation of transcription, DNA-dependent                                                   | 32 | 7.1E-21 | 40 | 1773 | 13528 | 6.10  | 2.2E-18 | 2.2E-18 | 9.6E-18 |
|                     | GO:0051252~regulation of RNA metabolic process                                                          | 32 | 1.4E-20 | 40 | 1813 | 13528 | 5.97  | 4.4E-18 | 2.2E-18 | 1.9E-17 |
|                     | GO:0006350~transcription                                                                                | 28 | 7.2E-14 | 40 | 2101 | 13528 | 4.51  | 2.3E-11 | 5.7E-12 | 9.7E-11 |
|                     | GO:0010629~negative regulation of gene expression                                                       | 9  | 7.8E-05 | 40 | 504  | 13528 | 6.04  | 2.4E-02 | 4.9E-03 | 1.0E-01 |
|                     | GO:0006357~regulation of transcription from RNA polymerase II promoter                                  | 9  | 9.3E-04 | 40 | 727  | 13528 | 4.19  | 2.5E-01 | 2.4E-02 | 1.2E+00 |
|                     | GO:0010605~negative regulation of macromolecule metabolic process                                       | 9  | 9.9E-04 | 40 | 734  | 13528 | 4.15  | 2.7E-01 | 2.2E-02 | 1.3E+00 |
|                     | GO:0016481~negative regulation of transcription                                                         | 8  | 3.0E-04 | 40 | 459  | 13528 | 5.89  | 8.9E-02 | 1.5E-02 | 4.0E-01 |
|                     | GO:0045934~negative regulation of nucleobase, nucleoside, nucleotide and nucleic acid metabolic process | 8  | 5.7E-04 | 40 | 512  | 13528 | 5.28  | 1.7E-01 | 2.0E-02 | 7.7E-01 |
|                     | GO:0051172~negative regulation of nitrogen compound metabolic process                                   | 8  | 6.2E-04 | 40 | 519  | 13528 | 5.21  | 1.8E-01 | 1.9E-02 | 8.3E-01 |
|                     | GO:0010558~negative regulation of macromolecule biosynthetic process                                    | 8  | 8.5E-04 | 40 | 547  | 13528 | 4.95  | 2.3E-01 | 2.4E-02 | 1.1E+00 |
|                     | GO:0031327~negative regulation of cellular biosynthetic process                                         | 8  | 9.8E-04 | 40 | 561  | 13528 | 4.82  | 2.7E-01 | 2.4E-02 | 1.3E+00 |
|                     | GO:0009890~negative regulation of biosynthetic process                                                  | 8  | 1.1E-03 | 40 | 573  | 13528 | 4.72  | 3.0E-01 | 2.3E-02 | 1.5E+00 |
|                     | GO:0045892~negative regulation of transcription, DNA-dependent                                          | 7  | 5.0E-04 | 40 | 356  | 13528 | 6.65  | 1.5E-01 | 2.2E-02 | 6.7E-01 |
|                     | GO:0051253~negative regulation of RNA metabolic process                                                 | 7  | 5.4E-04 | 40 | 362  | 13528 | 6.54  | 1.6E-01 | 2.1E-02 | 7.3E-01 |
|                     | GO:0045893~positive regulation of transcription, DNA-dependent                                          | 7  | 2.3E-03 | 40 | 477  | 13528 | 4.96  | 5.1E-01 | 4.4E-02 | 3.0E+00 |

|                                                                                                         |   |         |    |     |       |      |         |         |         |
|---------------------------------------------------------------------------------------------------------|---|---------|----|-----|-------|------|---------|---------|---------|
| GO:0051254~positive regulation of RNA metabolic process                                                 | 7 | 2.4E-03 | 40 | 481 | 13528 | 4.92 | 5.2E-01 | 4.3E-02 | 3.1E+00 |
| GO:0045941~positive regulation of transcription                                                         | 7 | 5.2E-03 | 40 | 564 | 13528 | 4.20 | 8.0E-01 | 8.2E-02 | 6.7E+00 |
| GO:0010628~positive regulation of gene expression                                                       | 7 | 6.0E-03 | 40 | 581 | 13528 | 4.07 | 8.5E-01 | 9.0E-02 | 7.7E+00 |
| GO:0045935~positive regulation of nucleobase, nucleoside, nucleotide and nucleic acid metabolic process | 7 | 8.4E-03 | 40 | 624 | 13528 | 3.79 | 9.3E-01 | 1.1E-01 | 1.1E+01 |
| GO:0051173~positive regulation of nitrogen compound metabolic process                                   | 7 | 9.7E-03 | 40 | 644 | 13528 | 3.68 | 9.5E-01 | 1.2E-01 | 1.2E+01 |
| GO:0045944~positive regulation of transcription from RNA polymerase II promoter                         | 6 | 4.0E-03 | 40 | 371 | 13528 | 5.47 | 7.2E-01 | 6.8E-02 | 5.3E+00 |
| GO:0000122~negative regulation of transcription from RNA polymerase II promoter                         | 5 | 7.0E-03 | 40 | 266 | 13528 | 6.36 | 8.9E-01 | 1.0E-01 | 9.0E+00 |

**Supplemental Table 2. Gene Ontology enrichment analysis.**

The table shows enrichments of Gene Ontology annotations in *A. thaliana*, *D. melanogaster*, *M. musculus*, and *H. sapiens* TFs predicted to be targeted by miPs.
