# Supplementary material
Source: PubMed Central journal article supplement (PMC4012575)
Supplement: supp_pp.114.235903_235903Magnani-TableS3.pdf [file supp_pp.114.235903_235903Magnani-TableS3.pdf]

|                                | miP                |
|--------------------------------|--------------------|
| <i>Zea mays</i>                |                    |
|                                | GRMZM2G060050_P01  |
| <i>Oryza sativa</i>            |                    |
|                                | LOC_Os03g47022.1   |
|                                | LOC_Os03g47042.1   |
| <i>Arabidopsis thaliana</i>    |                    |
|                                | AT1G14760.1        |
|                                | AT1G14760.3        |
|                                | AT1G14760.2        |
| <i>Glycine max</i>             |                    |
|                                | Glyma09g30330.1    |
|                                | Glyma20g22970.1    |
|                                | Glyma18g20430.1    |
| <i>Populus trichocarpa</i>     |                    |
|                                | POPTR_0004s00610.1 |
|                                | POPTR_0012s04040.1 |
|                                | POPTR_0011s01600.1 |
|                                | POPTR_0015s09030.1 |
|                                | POPTR_0012s08910.1 |
|                                | POPTR_0010s05330.1 |
| <i>Cenorhabditis elegans</i>   |                    |
|                                | F39D8.2a           |
|                                | F39D8.2b           |
| <i>Drosophila melanogaster</i> |                    |
|                                | FBpp0099878        |
|                                | FBpp0099879        |
| <i>Mus musculus</i>            |                    |
|                                | HTH-Meis1          |
| <i>Homo sapiens</i>            |                    |
|                                | AAF81642.1         |

**Supplemental Table 3. Putative miPs predicted to target TALE Meis/KNOX TFs.**

List of all miPs predicted to target TALE Meis/KNOX TFs. The HTH-Meis1 miP is not annotated in the *M. musculus* protein database but it has been previously described (Noro, Culi et al. 2006).
