# Supplementary material
Source: PubMed Central journal article supplement (PMC4012575)
Supplement: supp_pp.114.235903_235903Magnani-TableS5.pdf [file supp_pp.114.235903_235903Magnani-TableS5.pdf]

| InterPro Entry Accession | InterPro Entry Short Name     | InterPro Entry Name                                           | Family                                |
|--------------------------|-------------------------------|---------------------------------------------------------------|---------------------------------------|
| IPR015479                | Transcript_fact_AF4           | Transcription factor AF4                                      | AFF                                   |
| IPR004979                | TF_AP2                        | Transcription factor AP-2                                     | AP2                                   |
| IPR013854                | TF_AP2_C                      | Transcription factor AP-2, C-terminal                         | AP2                                   |
| IPR001606                | ARID/BRIGHT_DNA-bd            | ARID/BRIGHT DNA-binding domain                                | ARID/BRIGHT                           |
| IPR015350                | Beta-trefoil                  | Beta-trefoil                                                  | Beta-trefoil                          |
| IPR011598                | HLH_DNA-bd                    | Helix-loop-helix DNA-binding                                  | bHLH                                  |
| IPR016637                | TF_bHLH_NeuroD                | Transcription factor, basic helix-loop-helix, NeuroD          | bHLH                                  |
| IPR001067                | Nuc_translocat                | Nuclear translocator                                          | bHLH                                  |
| IPR015660                | ASH                           | Achaete-scute transcription factor-related                    | bHLH                                  |
| IPR015789                | Twist                         | Twist                                                         | bHLH                                  |
| IPR022575                | Neurogenic_DUF                | Neurogenic differentiation factor, domain of unknown function | bHLH                                  |
| IPR002418                | Tscript_reg_Myc               | Transcription regulator Myc                                   | bHLH-ZIP                              |
| IPR005643                | JNK                           | Jun-like transcription factor                                 | bHLH-ZIP                              |
| IPR001630                | Leuzip_CREB                   | cAMP response element binding (CREB) protein                  | bZIP                                  |
| IPR004826                | bZIP_Maf                      | Basic leucine zipper domain, Maf-type                         | bZIP                                  |
| IPR004827                | bZIP                          | Basic-leucine zipper domain                                   | bZIP                                  |
| IPR011616                | bZIP_1                        | bZIP transcription factor, bZIP-1                             | bZIP                                  |
| IPR011700                | bZIP_2                        | Basic leucine zipper                                          | bZIP                                  |
| IPR016743                | TF_bZIP_E4BP4                 | Transcription factor, basic leucine zipper, E4BP4             | bZIP                                  |
| IPR008917                | Euk_TF_DNA-bd                 | Eukaryotic transcription factor, Skn-1-like, DNA-binding      | bZIP                                  |
| IPR002112                | Leuzip_Jun                    | Transcription factor Jun                                      | bZIP                                  |
| IPR010533                | Vert_IL3-reg_TF               | Vertebrate interleukin-3 regulated transcription factor       | bZIP                                  |
| IPR015558                | C_Jun                         | c-Jun Transcription Factor                                    | bZIP                                  |
| IPR012955                | CASP_C                        | CASP, C-terminal                                              | CASP                                  |
| IPR001289                | TF_CBF3                       | CCAAT-binding transcription factor, subunit B                 | CCAAT                                 |
| IPR005612                | CCAAT-binding_factor          | CCAAT-binding factor                                          | CCAAT                                 |
| IPR016468                | CCAAT/enhancer-binding        | CCAAT/enhancer-binding                                        | CCAAT                                 |
| IPR005559                | CG-1_dom                      | CG-1 DNA-binding domain                                       | CG-1                                  |
| IPR002059                | CSP_DNA-bd                    | Cold-shock protein, DNA-binding                               | COLD-SHOCK                            |
| IPR007604                | CP2                           | CP2 transcription factor                                      | CP2 transcription factor (CP2)        |
| IPR004022                | DDT_dom                       | DDT domain                                                    | DDT                                   |
| IPR001275                | DM_DNA-bd                     | DM DNA-binding                                                | DM                                    |
| IPR003150                | RFX_DNA-bd                    | DNA-binding RFX                                               | DNA-binding Regulatory Factor X (RFX) |
| IPR014889                | Transc_factor_DP_C            | Transcription factor DP, C-terminal                           | DP                                    |
| IPR015648                | Transcript_fac_DP             | Transcription factor DP                                       | DP                                    |
| IPR016556                | Transcription_factor_DP_subgr | Transcription factor DP, subgroup                             | DP                                    |
| IPR003853                | Adeno_E1A                     | E1A early regulatory protein                                  | E1A-like factors                      |
| IPR000418                | Ets                           | Ets                                                           | ETS                                   |
| IPR016311                | Transforming_factor_C-ets     | Transforming factor C-ets                                     | ETS                                   |
| IPR022084                | TF_Elf-1_N                    | Transcription factor Elf-1, N-terminal                        | ETS                                   |
| IPR006715                | ETS_PEA3_N                    | PEA3-type ETS-domain transcription factor, N-terminal         | ETS-PEA3                              |

|           |                           |                                                     |                |
|-----------|---------------------------|-----------------------------------------------------|----------------|
| IPR001766 | TF_fork_head              | Transcription factor, fork head                     | Forkhead       |
| IPR018122 |                           | Transcription factor, fork head, conserved site     | Forkhead       |
| IPR015633 | E2F                       | E2F Family                                          | Forkhead       |
| IPR003316 | E2F_TDP                   | Transcription factor E2F/dimerisation partner (TDP) | Forkhead       |
| IPR015634 | Transcription_factor_E2F1 | Transcription factor E2F1                           | Forkhead       |
| IPR015635 | Transcription_factor_E2F6 | Transcription factor E2F6                           | Forkhead       |
| IPR003902 | Tscrtpt_reg_GCM_motif     | Transcription regulator, GCM-like                   | GCM            |
| IPR001321 | HIF-1_alpha               | Hypoxia-inducible factor-1 alpha                    | HIF            |
| IPR000637 | HMG1/Y_DNA-bd_CS          | HMG-I/HMG-Y, DNA-binding, conserved site            | HMG            |
| IPR000910 | HMG_HMG1/HMG2             | High mobility group, HMG1/HMG2                      | HMG            |
| IPR009071 | HMG_superfamily           | High mobility group, superfamily                    | HMG            |
| IPR000116 | HMG1/HMGY                 | High mobility group, HMG-I/HMG-Y                    | HMG            |
| IPR000135 | HMG_HMG1/HMG2_subgr       | High mobility group, HMG1/HMG2, subgroup            | HMG            |
| IPR015101 | DUF1898                   | Domain of unknown function DUF1898                  | HMG            |
| IPR017956 |                           | AT hook, DNA-binding motif                          | HMG            |
| IPR000327 | POU_specific              | POU-specific                                        | Homeodomain    |
| IPR000747 | Homeobox-engrailed        | Homeobox engrailed                                  | Homeodomain    |
| IPR001356 | Homeobox                  | Homeobox                                            | Homeodomain    |
| IPR001827 | Homeobox_Antennapedia_CS  | Homeobox protein, antennapedia type, conserved site | Homeodomain    |
| IPR003022 | Otx2_TF                   | Transcription factor Otx2                           | Homeodomain    |
| IPR003025 | Otx_TF                    | Transcription factor Otx                            | Homeodomain    |
| IPR003026 | Otx1_TF                   | Transcription factor Otx1                           | Homeodomain    |
| IPR003106 | Leu_zip_homeo             | Leucine zipper, homeobox-associated                 | Homeodomain    |
| IPR003350 | Hmoeo_CUT                 | Homeodomain protein CUT                             | Homeodomain    |
| IPR006455 | Homeo_ZF_HD               | Homeobox domain, ZF-HD class                        | Homeodomain    |
| IPR007738 | Prox1                     | Prospero homeobox protein 1                         | Homeodomain    |
| IPR008422 | Homeobox_KN_domain        | Homeobox KN domain                                  | Homeodomain    |
| IPR009057 | Homeodomain-like          | Homeodomain-like                                    | Homeodomain    |
| IPR012287 | Homeodomain-rel           | Homeodomain-related                                 | Homeodomain    |
| IPR016233 | Homeobox_Pitx/unc30       | Homeobox Pitx/unc30                                 | Homeodomain    |
| IPR016362 | Transcription_factor_POU  | Transcription factor, homeobox/POU                  | Homeodomain    |
| IPR017112 | Homeobox_Hox9             | Homeobox, Hox9                                      | Homeodomain    |
| IPR021980 | TF_homeodomain_male       | Transcription factor homeodomain, male germ-cell    | Homeodomain    |
| IPR000047 | HTH_motif                 | Helix-turn-helix motif                              | Homeodomain    |
| IPR001005 | SANT_DNA-bd               | SANT domain, DNA binding                            | Homeodomain    |
| IPR017970 |                           | Homeobox, conserved site                            | Homeodomain    |
| IPR020479 |                           | Homeobox, eukaryotic                                | Homeodomain    |
| IPR015584 | POU4-related              | POU domain-containing protein, class 4-related      | Homeodomain    |
| IPR015585 | POU_dom_5                 | POU domain-containing protein, class 5              | Homeodomain    |
| IPR000972 | TF_octamer                | Octamer-binding transcription factor                | Homeodomain    |
| IPR013851 | Otx_TF_C                  | Transcription factor Otx, C-terminal                | Homeodomain    |
| IPR015586 | Pit_1                     | Pituitary-specific positive transcription factor 1  | Homeodomain    |
| IPR000232 | HSF_DNA-bd                | Heat shock factor (HSF)-type, DNA-binding           | HSF            |
| IPR010542 | Vert_HS_TF                | Vertebrate heat shock transcription factor          | HSF            |
| IPR000524 | Tscrtpt_reg_HTH_GntR      | Transcription regulator HTH, GntR                   | HTH-GntR       |
| IPR016177 | DNA-bd_integrase-typ      | DNA-binding, integrase-type                         | Integrase-type |
| IPR001739 | Methyl_CpG_DNA-bd         | Methyl-CpG DNA binding                              | Integrase-type |

|           |                                |                                                         |                              |
|-----------|--------------------------------|---------------------------------------------------------|------------------------------|
| IPR002909 | IPT_TIG_rcpt                   | Cell surface receptor IPT/TIG                           | IPT/TIG                      |
| IPR001346 | Interferon_reg_fact_DNA-bd_dom | Interferon regulatory factor DNA-binding domain         | MAD                          |
| IPR001132 | SMAD_dom_Dwarfin-type          | SMAD domain, Dwarfin-type                               | MAD                          |
| IPR003619 | MAD_homology1_Dwarfin-type     | MAD homology 1, Dwarfin-type                            | MAD                          |
| IPR013019 | MAD_homology_MH1               | MAD homology, MH1                                       | MAD                          |
| IPR013790 | Dwarfin                        | Dwarfin                                                 | MAD                          |
| IPR008984 | SMAD/FHA domain                | SMAD/FHA domain                                         | MAD                          |
| IPR002100 | TF_MADSbox                     | Transcription factor, MADS-box                          | MADS box                     |
| IPR006447 | Myb-like+DNA-bd_dom_SHAQKYF    | Myb-like DNA-binding domain, SHAQKYF class              | MYB                          |
| IPR014778 | Myb_DNA-bd                     | Myb, DNA-binding                                        | MYB                          |
| IPR015495 | Myb_trans_fac                  | Myb transcription factor                                | MYB                          |
| IPR013681 | Myelin_TF                      | Myelin transcription factor 1                           | MYT1                         |
| IPR008366 | NFAT                           | Nuclear factor of activated T cells (NFAT)              | NFAT                         |
| IPR015646 | NFAT5                          | Nuclear factor of activated T-cells 5                   | NFAT                         |
| IPR015647 | NFAT1                          | Nuclear factor of activated T-cells 1                   | NFAT                         |
| IPR017426 | Nuclear_rcpt_coactivator       | Nuclear receptor coactivator                            | Nuclear receptor coactivator |
| IPR002117 | p53_tumour_suppressor          | p53 tumour suppressor family                            | p53                          |
| IPR008967 | p53-like_TF_DNA-bd             | p53-like transcription factor, DNA-binding              | p53                          |
| IPR011615 | p53_DNA-bd                     | p53, DNA-binding domain                                 | p53                          |
| IPR012346 | p53/RUNT-type_TF_DNA-bd        | p53/RUNT-type transcription factor, DNA-binding domain  | p53                          |
| IPR011539 | RHD                            | Rel homology                                            | p53                          |
| IPR013524 | AML1/Runt_N                    | Acute myeloid leukemia 1 (AML 1)/Runt                   | p53                          |
| IPR015351 | LAG1_DNA-bd                    | LAG1, DNA binding                                       | p53                          |
| IPR024061 | NDT80_DNA-bd_dom               | NDT80 DNA-binding domain                                | p53                          |
| IPR013847 | POU                            | POU                                                     | POU                          |
| IPR000451 | NF_Rel_dor                     | NF-kappa-B/Rel/dorsal                                   | REL                          |
| IPR000040 | AML1_Runt                      | Acute myeloid leukemia 1 protein (AML 1)/Runt           | RUNT                         |
| IPR016554 | TF_Runt-rel_RUNX               | Transcription factor, Runt-related, RUNX                | RUNT                         |
| IPR000770 | SAND_dom                       | SAND domain                                             | SAND                         |
| IPR010919 | SAND_dom-like                  | SAND domain-like                                        | SAND                         |
| IPR012345 | STAT_TF_DNA-bd_sub             | STAT transcription factor, DNA-binding, subdomain       | STAT                         |
| IPR013801 | STAT_TF_DNA-bd                 | STAT transcription factor, DNA-binding                  | STAT                         |
| IPR001217 | STAT_TF_core                   | STAT transcription factor, core                         | STAT                         |
| IPR000814 | TBP                            | TATA-box binding protein                                | TATA                         |
| IPR004823 | TAF_TATA-bd                    | TATA box binding protein associated factor (TAF)        | TATA                         |
| IPR013932 | TATA-bd_TIP120                 | TATA-binding protein interacting (TIP20)                | TATA                         |
| IPR022091 | TMF_TATA-bd                    | TATA element modulatory factor 1 TATA binding           | TATA                         |
| IPR022092 | TMF_DNA-bd                     | TATA element modulatory factor 1 DNA binding            | TATA                         |
| IPR001699 | TF_T-box                       | Transcription factor, T-box                             | TBX                          |
| IPR002070 | TF_Brachyury                   | Transcription factor, Brachyury                         | TBX                          |
| IPR022582 | TBX                            | Transcription factor, T-box, region of unknown function | TBX                          |
| IPR000818 | TEA/ATTS                       | TEA/ATTS                                                | TEA                          |
| IPR016361 | TEF                            | Transcriptional enhancer factor                         | TEA                          |
| IPR016378 | TF_cAMP-dep                    | Transcription factor, cyclic AMP-dependent              | TF-cAMP-dep                  |
| IPR013498 | Topo_IA_Znf                    | DNA topoisomerase, type IA, zn finger                   | Topoisomerase                |
| IPR008895 | YL1                            | YL1 nuclear                                             | YL1                          |
| IPR006794 | Transcrp_activ_Zfx/Zfy-dom     | Transcriptional activator, Zfx / Zfy domain             | ZFX/ZFY                      |

|           |                               |                                                            |              |
|-----------|-------------------------------|------------------------------------------------------------|--------------|
| IPR002653 | Znf_A20                       | Zinc finger, A20-type                                      | ZNF-A20      |
| IPR000315 | Znf_B-box                     | Zinc finger, B-box                                         | ZNF-BBOX     |
| IPR003656 | Znf_BED_prd                   | Zinc finger, BED-type predicted                            | ZNF-BED      |
| IPR006612 | Znf_C2CH                      | Zinc finger, C2CH-type                                     | ZNF-C2CH     |
| IPR006579 | Pre_C2HC                      | Pre-C2HC                                                   | ZNF-C2H2     |
| IPR007087 | Znf_C2H2                      | Zinc finger, C2H2                                          | ZNF-C2H2     |
| IPR014898 | Znf_C2H2_LYAR                 | Zinc finger, C2H2, LYAR-type                               | ZNF-C2H2     |
| IPR015880 | Znf_C2H2-like                 | Zinc finger, C2H2-like                                     | ZNF-C2H2     |
| IPR019406 | Znf_C2H2_APLF-like            | Zinc finger, C2H2, APLF-like                               | ZNF-C2H2     |
| IPR022755 | Znf_C2H2_jaz                  | Zinc finger, double-stranded RNA binding                   | ZNF-C2H2     |
| IPR015318 | Znf_GAGA-bd_fac               | Zinc finger, GAGA-binding factor                           | ZNF-C2H2     |
| IPR022776 | TRM13/UPF0224_CHHC_Znf_dom    | TRM13/UPF0224 family, U11-48K-like CHHC zinc finger domain | ZNF-C2H2     |
| IPR013087 |                               | Zinc finger, C2H2-type/integrase, DNA-binding              | ZNF-C2H2     |
| IPR003604 |                               | Zinc finger, U1-type                                       | ZNF-C2H2     |
| IPR009170 | RIZ_retinblastoma-bd_prot     | Predicted retinoblastoma binding protein (RIZ)             | ZNF-C2H2     |
| IPR017124 | Znf_PRDM4                     | PR-domain zinc finger protein PRDM4                        | ZNF-C2H2     |
| IPR017126 | Znf_PRDM12                    | PR-domain zinc finger protein PRDM12                       | ZNF-C2H2     |
| IPR022800 | Spt4/RpoE2_Znf                | Spt4/RpoE2 zinc finger                                     | ZNF-C4       |
| IPR018482 | Znf_C4H2                      | Zinc finger, C4H2-type                                     | ZNF-C4H2     |
| IPR004198 | Znf_C5HC2                     | Zinc finger, C5HC2-type                                    | ZNF-C5HC2    |
| IPR000058 | Znf_AN1                       | Zinc finger, AN1-type                                      | ZNF-C6       |
| IPR001138 | Zn2-C6_fun-type_DNA-bd        | Zn(2)-C6 fungal-type DNA-binding domain                    | ZNF-C6       |
| IPR002867 | Znf_C6HC                      | Zinc finger, C6HC-type                                     | ZNF-C6       |
| IPR000571 | Znf_CCCH                      | Zinc finger, CCCH-type                                     | ZNF-CCCH     |
| IPR021721 | Znf_CCCH-type_TRM13           | Zinc finger, CCCH-type, TRM13                              | ZNF-CCCH     |
| IPR021005 | Znf_CGNR                      | Zinc finger, CGNR                                          | ZNF-CGNR     |
| IPR002515 | Znf_C2HC                      | Zinc finger, C2HC-type                                     | ZNF-CHC2     |
| IPR002694 | Znf_CHC2                      | Zinc finger, CHC2-type                                     | ZNF-CHC2     |
| IPR002857 | Znf_CXXC                      | Zinc finger, CXXC-type                                     | ZNF-CXXC     |
| IPR001594 | Znf_DHHC_palmitoyltransferase | Zinc finger, DHHC-type, palmitoyltransferase               | ZNF-DHHC     |
| IPR010666 | Znf_GRF                       | Zinc finger, GRF-type                                      | ZNF-GRF      |
| IPR015416 | Znf_H2C2_histone_UAS-bd       | Zinc finger, H2C2-type, histone UAS binding                | ZNF-H2C2     |
| IPR000197 | Znf_TAZ                       | Zinc finger, TAZ-type                                      | ZNF-HCCC     |
| IPR004181 |                               | Zinc finger, MIZ-type                                      | ZNF-MIZ      |
| IPR000967 | Znf_NFX1                      | Zinc finger, NF-X1-type                                    | ZNF-NF-X1    |
| IPR019607 | Putative_zinc-finger_domain   | Putative zinc-finger domain                                | ZNF-Other    |
| IPR022137 | DUF3669_Znf                   | Protein of unknown function DUF3669, zinc finger protein   | ZNF-Other    |
| IPR000976 | Wilms_tumour_N                | Wilm's tumour protein, N-terminal                          | ZNF-Other    |
| IPR022114 | TF_doublesex/Mab3-rel         | Transcription factor, double-sex/mab3-related              | ZNF-other    |
| IPR019787 | Znf_PHD-finger                | Zinc finger, PHD-finger                                    | ZNF-PHD      |
| IPR000679 | Znf_GATA                      | Zinc finger, GATA-type                                     | ZNF-receptor |
| IPR016374 | TF_GATA-1/2/3                 | Transcription factor, GATA-1/2/3                           | ZNF-receptor |
| IPR016375 | TF_GATA_4/5/6                 | Transcription factor GATA-4/5/6                            | ZNF-receptor |
| IPR016679 | TF_GATA_pln                   | Transcription factor, GATA, plant                          | ZNF-receptor |
| IPR013088 |                               | Zinc finger, NHR/GATA-type                                 | ZNF-receptor |
| IPR000003 | Retinoid-X_rcpt               | Retinoid X receptor                                        | ZNF-receptor |
| IPR000324 | VitD_rcpt                     | Vitamin D receptor                                         | ZNF-receptor |
| IPR001103 | Andrgn_rcpt                   | Androgen receptor                                          | ZNF-receptor |

|           |                               |                                                                         |                      |
|-----------|-------------------------------|-------------------------------------------------------------------------|----------------------|
| IPR001409 | Glcrtcd_rcpt                  | Glucocorticoid receptor                                                 | ZNF-receptor         |
| IPR001628 | Znf_hrmn_rcpt                 | Zinc finger, nuclear hormone receptor-type                              | ZNF-receptor         |
| IPR001723 | Str_hrmn_rcpt                 | Steroid hormone receptor                                                | ZNF-receptor         |
| IPR001728 | ThyrH_rcpt                    | Thyroid hormone receptor                                                | ZNF-receptor         |
| IPR003069 | Ecdystd_rcpt                  | Ecdysteroid receptor                                                    | ZNF-receptor         |
| IPR003070 | Nuc_orph_rcpt                 | Orphan nuclear receptor                                                 | ZNF-receptor         |
| IPR003071 | Nuc_orp_HMR_rcpt              | Orphan nuclear receptor, HMR type                                       | ZNF-receptor         |
| IPR003072 | NOR1_rcpt                     | Orphan nuclear receptor, NOR1 type                                      | ZNF-receptor         |
| IPR003073 | NURR_rcpt                     | Orphan nuclear receptor, NURR type                                      | ZNF-receptor         |
| IPR003074 | 1Cnucl_rcpt                   | Peroxisome proliferator-activated receptor                              | ZNF-receptor         |
| IPR003075 | 1Cnucl_rcpt_B                 | Peroxisome proliferator-activated receptor, beta                        | ZNF-receptor         |
| IPR003076 | 1Cnucl_rcpt_A                 | Peroxisome proliferator-activated receptor, alpha                       | ZNF-receptor         |
| IPR003077 | 1Cnucl_rcpt_G                 | Peroxisome proliferator-activated receptor, gamma                       | ZNF-receptor         |
| IPR003078 | Retinoic_acid_rcpt            | Retinoic acid receptor                                                  | ZNF-receptor         |
| IPR003079 | ROR_rcpt                      | Nuclear receptor ROR                                                    | ZNF-receptor         |
| IPR003068 | COUP_TF                       | Transcription factor COUP                                               | ZNF-receptor         |
| IPR018957 | Znf_C3HC4_RING-type           | Zinc finger, C3HC4 RING-type                                            | ZNF-RING             |
| IPR000433 | Znf_ZZ                        | Zinc finger, ZZ-type                                                    | ZNF-ZZ               |
| IPR001387 | HTH_3                         | Helix-turn-helix type 3                                                 | HTH-type3            |
| IPR007889 | HTH_psq                       | Helix-turn-helix, Psq                                                   | HTH-psq              |
| IPR010982 | Lambda_DNA-bd                 | Lambda repressor-like, DNA-binding                                      | HTH-Lambda repressor |
| IPR011526 | HTH_psq-like                  | Helix-turn-helix, Psq-like                                              | HTH-psq              |
| IPR011991 |                               | Winged helix-turn-helix transcription repressor DNA-binding             | HTH-winged           |
| IPR000119 | Hist_DNA-bd_bac               | Histone-like bacterial DNA-binding protein                              |                      |
| IPR000148 | Papilloma_E7                  | Papillomavirus E7                                                       |                      |
| IPR000194 | ATPase_F1/V1/A1_a/bsu_nucl-bd | ATPase, F1/V1/A1 complex, alpha/beta subunit, nucleotide-binding domain |                      |
| IPR000281 | HTH_RpiR                      | Helix-turn-helix protein RpiR                                           | HTH-RpiR             |
| IPR000306 | Znf_FYVE                      | Zinc finger, FYVE-type                                                  |                      |
| IPR000427 | Papillomavirus_E2_C           | Papillomavirus E2, C-terminal                                           |                      |
| IPR000485 | Tscrpt_reg_HTH_AsnC-type      | Transcription regulator HTH, AsnC-type                                  | HTH-winged           |
| IPR000504 | RRM_dom                       | RNA recognition motif domain                                            | RRM                  |
| IPR000551 | Tscrpt_reg_HTH_MerR           | Transcription regulator HTH, MerR                                       | HTH-MerR             |
| IPR000580 | TSC-22_Dip_Bun                | TSC-22 / Dip / Bun                                                      |                      |
| IPR000595 | cNMP-bd_dom                   | Cyclic nucleotide-binding domain                                        | cNMP                 |
| IPR000625 | REV_protein                   | Anti-repression trans-activator protein, REV protein                    |                      |
| IPR000635 | Viral_ssDNA-bd                | Viral ssDNA-binding protein                                             |                      |
| IPR000647 | CTF/NFI                       | CTF transcription factor/nuclear factor 1                               |                      |
| IPR000655 | Phage_lambda_Cro              | Bacteriophage lambda, Cro repressor                                     |                      |
| IPR000792 | Tscrpt_reg_LuxR_C             | Transcription regulator LuxR, C-terminal                                | HTH-LuxR             |
| IPR000831 | Trp_repress                   | Trp repressor                                                           | TrpR                 |
| IPR000835 | Tscrpt_reg_HTH_MarR-typ       | Transcription regulator HTH, MarR-type                                  | HTH-MarR             |
| IPR000843 | Tscrpt_reg_HTH_LacI           | Transcription regulator HTH, LacI                                       | HTH-Lambda repressor |
| IPR000847 | Tscrpt_reg_HTH_LysR           | Transcription regulator HTH, LysR                                       | HTH-winged           |
| IPR000962 | Znf_DskA_TraR                 | Zinc finger, DksA/TraR C4-type                                          | ZNF-C4               |
| IPR001034 | Tscrpt_reg_HTH_DeoR_N         | Transcription regulator HTH, DeoR N-terminal                            | HTH-DeoR             |
| IPR001083 | Cu_fist_DNA-bd                | Copper fist DNA-binding                                                 | Copper fist          |

|           |                           |                                                              |                |
|-----------|---------------------------|--------------------------------------------------------------|----------------|
| IPR001159 | Ds-RNA-bd                 | Double-stranded RNA-binding                                  |                |
| IPR001222 | Znf_TFIIS                 | Zinc finger, TFIIS-type                                      |                |
| IPR001313 | Pumilio_RNA-bd_rpt        | Pumilio RNA-binding repeat                                   |                |
| IPR001367 | Fe_dep_repressor          | Iron dependent repressor                                     | HTH-winged     |
| IPR001471 | TF_ERF_DNA-bd             | Pathogenesis-related transcriptional factor/ERF, DNA-binding | ERF            |
| IPR001647 | DNA-bd_HTH_TetR-type      | DNA-binding HTH domain, TetR-type                            | HTH-Tet-R      |
| IPR001669 | Arg_repress               | Arginine repressor                                           | HTH-winged     |
| IPR001787 | Ribosomal_L21             | Ribosomal protein L21                                        |                |
| IPR001801 | Histone_HNS               | Histone-like nucleoid-structuring protein H-NS               |                |
| IPR001808 | Tsript_reg_HTH_Crp        | Transcription regulator HTH, Crp                             | HTH-Crp        |
| IPR001845 | HTH_ArsR_DNA-bd_dom       | HTH ArsR-type DNA-binding domain                             | HTH-ArsR       |
| IPR001849 | Pleckstrin_homology       | Pleckstrin homology domain                                   |                |
| IPR001866 | Papillomavirus_E2_N       | Papillomavirus E2, N-terminal                                |                |
| IPR001867 | Sig_transdc_resp-reg_C    | Signal transduction response regulator, C-terminal           | HTH-winged     |
| IPR002084 | Met_repressor_MetJ        | Methionine repressor MetJ                                    | Ribbon-hlx-hlx |
| IPR002145 | CopG_DNA-bd               | CopG-like DNA-binding                                        | Ribbon-hlx-hlx |
| IPR002148 | Rotavirus_NSP1            | Rotavirus non-structural protein 1                           |                |
| IPR002197 | HTH_Fis                   | Helix-turn-helix, Fis-type                                   | HTH-Fis        |
| IPR002409 | Aflatoxin_BRP             | Aflatoxin biosynthesis regulatory protein                    | ZNF-C6         |
| IPR002478 | PUA                       | Pseudouridine synthase/archaeosine transglycosylase          |                |
| IPR002481 | FUR                       | Ferric-uptake regulator                                      | FUR            |
| IPR002547 | tRNA-bd_dom               | tRNA-binding domain                                          |                |
| IPR002568 | Carla-bd                  | Carlavirus nucleic acid-binding protein                      |                |
| IPR002571 | WHTH_transcript_rep_HrcA  | Winged helix-turn-helix transcription repressor, HrcA        | HTH-winged     |
| IPR002577 | HTH_HxlR                  | Helix-turn-helix, HxlR type                                  | HTH-HxlR       |
| IPR002586 | CbiA_P_synth              | Cobyrinic acid a,c-diamide synthase                          |                |
| IPR002634 | BoIA                      | BoIA protein                                                 |                |
| IPR002687 | SnoRNA-bd_dom             | Pre-mRNA processing ribonucleoprotein, snoRNA-binding domain |                |
| IPR002836 | TFAR19_DNA-bd             | DNA-binding TFAR19-related protein                           |                |
| IPR002910 | FLO_LFY                   | Floricaula/leafy protein                                     | FLO/LFY        |
| IPR003012 | Tet_transcr_reg_TetR      | Tetracycline transcriptional regulator, TetR                 |                |
| IPR003029 | Rbsml_prot_S1_RNA-bd_dom  | Ribosomal protein S1, RNA-binding domain                     |                |
| IPR003120 | TF_STE                    | Transcription factor, STE-like                               |                |
| IPR003126 | Znf_N-recognin            | Zinc finger, N-recognin                                      |                |
| IPR003162 | TFIID-31                  | Transcription factor TAFII-31                                |                |
| IPR003163 | Tsript_reg_HTH_APSES-type | Transcription regulator HTH, APSES-type DNA-binding domain   | HTH-APSES      |
| IPR003174 | Alpha_TIF                 | Alpha trans-inducing protein (Alpha-TIF)                     |                |
| IPR003176 | Adenovirus_DNA-bd_N       | Adenovirus DNA-binding, N-terminal                           |                |
| IPR003195 | TFIID-18                  | Transcription initiation factor IID, 18kDa subunit           |                |
| IPR003196 | TFIIF_beta                | Transcription initiation factor IIF, beta subunit            |                |
| IPR003223 | Flag1_repressor           | Flagellin phase1 repressor                                   |                |
| IPR003224 | Znf_P11                   | Zinc finger, P11-type                                        |                |
| IPR003228 | TFIID_sub                 | Transcription initiation factor TFIID                        |                |
| IPR003314 | MuA/Ci_DNA-bd             | Transposase MuA/Repressor Ci, DNA-binding                    |                |
| IPR003340 | B3_DNA-bd                 | B3 DNA binding domain                                        | B3             |
| IPR003389 | Adeno_IVa2                | Adenovirus IVa2 protein                                      |                |

|           |                               |                                                                                 |            |
|-----------|-------------------------------|---------------------------------------------------------------------------------|------------|
| IPR003390 | DNA_integrity_scan_DisA_N     | DNA integrity scanning protein, DisA, N-terminal                                |            |
| IPR003417 | CBF_beta                      | Core binding factor, beta subunit                                               |            |
| IPR003441 | NAM                           | No apical meristem (NAM) protein                                                | NAM        |
| IPR003482 | Whib                          | Transcription factor WhiB                                                       |            |
| IPR003495 | Cbl_biosynth_CobW-like        | Cobalamin (vitamin B12) biosynthesis CobW-like                                  |            |
| IPR003523 | Transcription_factor_COE      | Transcription factor COE                                                        |            |
| IPR003618 | TFIIS_cen_dom                 | Transcription elongation factor S-II, central domain                            |            |
| IPR003657 | WRKY_DNA-bd                   | DNA-binding WRKY                                                                | WRKY       |
| IPR003711 | CarD-like/TRCF_domain         | CarD-like/TRCF domain                                                           |            |
| IPR003851 | Znf_Dof                       | Zinc finger, Dof-type                                                           | ZNF-DOF    |
| IPR003888 | FYrich_N                      | FY-rich, N-terminal                                                             |            |
| IPR003889 | FYrich_C                      | FY-rich, C-terminal                                                             |            |
| IPR003923 | TFIID_30kDa                   | Transcription initiation factor TFIID, 23-30kDa subunit                         |            |
| IPR003957 | Transcrt_fac_CBFA/NFYB_topo   | Transcription factor, CBFA/NFYB, DNA topoisomerase                              | CCAAT      |
| IPR003958 | CBFA_NFYB_domain              | Transcription factor CBF/NF-Y/archaeal histone                                  | CCAAT      |
| IPR004009 | Myosin_N                      | Myosin, N-terminal, SH3-like                                                    |            |
| IPR004120 | Tax                           | HTLV Tax                                                                        |            |
| IPR004149 | Znf_DNAligase_C4              | Zinc-finger, NAD-dependent DNA ligase C4-type                                   |            |
| IPR004181 | Znf_MIZ                       | Zinc finger, MIZ-type                                                           |            |
| IPR004186 | EBNA1_DNA-bd                  | Epstein Barr virus nuclear antigen-1, DNA-binding                               |            |
| IPR004191 | Integrase_Tn916-type_DNA-bd_N | Integrase, Tn916-type, N-terminal DNA binding                                   |            |
| IPR004217 | Tim8/9/10/13_Znf-like         | Mitochondrial inner membrane translocase complex, Tim8/9/10/13-zinc finger-like |            |
| IPR004283 | Lef-2                         | Late expression factor 2                                                        |            |
| IPR004301 | Nucleoplasmin                 | Nucleoplasmin                                                                   |            |
| IPR004330 | FAR1_DNA_bnd_dom              | FAR1 DNA binding domain                                                         | ZNF-C2H2   |
| IPR004333 | Transcrt_factor_SBP-box       | Transcription factor, SBP-box                                                   | SBP        |
| IPR004341 | CAT_RNA-bd_dom                | CAT RNA-binding domain                                                          |            |
| IPR004356 | Fim_regulat                   | P pili regulatory PapB protein                                                  |            |
| IPR004365 | NA-bd_OB_tRNA-helicase        | Nucleic acid binding, OB-fold, tRNA/helicase-type                               |            |
| IPR004409 | Biotin_operon_repress_HTH     | Biotin operon repressor, helix-turn-helix domain                                | HTH-winged |
| IPR004457 | Znf_ZPR1                      | Zinc finger, ZPR1-type                                                          |            |
| IPR004598 | Tfb2                          | Transcription factor Tfb2                                                       |            |
| IPR004600 | TF_Tfb4                       | Transcription factor Tfb4                                                       |            |
| IPR004855 | TFIIA_asu/bsu                 | Transcription factor IIA, alpha/beta subunit                                    |            |
| IPR004956 | Foamy_BEL                     | Foamy virus BEL 1/2 protein                                                     |            |
| IPR004986 | Caulimo_DNA-bd                | Caulimovirus DNA-binding protein                                                |            |
| IPR004998 | Herpes_TAF50                  | Herpesvirus transcription activation factor                                     |            |
| IPR005022 | Pox_TAP                       | Viral trans-activator protein                                                   |            |
| IPR005033 | YEATS                         | YEATS                                                                           |            |
| IPR005034 | Dicer_dsRNA_binding_fold      | Dicer double-stranded RNA-binding fold                                          |            |
| IPR005202 | TF_GRAS                       | Transcription factor GRAS                                                       | GRAS       |
| IPR005206 | Herpes_ICP4_N                 | Herpesvirus ICP4-like protein, N-terminal                                       |            |
| IPR005333 | Transcription_factor_TCP      | Transcription factor, TCP                                                       | TCP        |
| IPR005376 | Adenovirus_DNA-bd_C           | Adenovirus DNA-binding, C-terminal                                              |            |
| IPR005381 | Znf-XS_domain                 | Zinc finger-XS domain                                                           |            |
| IPR005412 | Fis_DNA-bd                    | DNA-binding protein Fis                                                         | HTH-Fis    |
| IPR005471 | Tscrt_reg_IclR_N              | Transcription regulator IclR, N-terminal                                        | HTH-IclR   |

|           |                               |                                                                                   |               |
|-----------|-------------------------------|-----------------------------------------------------------------------------------|---------------|
| IPR005539 | ELK                           | ELK                                                                               | Homeodomain   |
| IPR005569 | Arc_DNA-bd                    | Arc-like DNA binding                                                              |               |
| IPR005580 | DbpA_RNA-bd                   | DbpA, RNA-binding                                                                 |               |
| IPR005650 | Pencillinase_R                | Penicillinase repressor                                                           | HTH-winged    |
| IPR005735 | Znf_LSD1                      | Zinc finger, LSD1-type                                                            | ZNF-LSD1      |
| IPR005818 | Histone_H1/H5                 | Histone H1/H5                                                                     | HTH-winged    |
| IPR006197 | Peptidase_S24_LexA            | Peptidase S24, LexA-like                                                          | HTH-winged    |
| IPR006199 | LexA_DNA-bd_dom               | LexA repressor, DNA-binding domain                                                | HTH-winged    |
| IPR006339 | Tscrpt_reg_AbrB               | Transcription regulator AbrB                                                      |               |
| IPR006377 | CcpA                          | Catabolite control protein A                                                      |               |
| IPR006572 | Znf_DBF                       | Zinc finger, DBF-type                                                             |               |
| IPR006578 | MADF-dom                      | MADF domain                                                                       | MADF          |
| IPR006628 | PUR_DNA_RNA-bd                | PUR-alpha/beta/gamma, DNA/RNA-binding                                             |               |
| IPR006657 | MoPterin_dinucl-bd_dom        | Molybdopterin dinucleotide-binding domain                                         |               |
| IPR006695 | Centromere_CenpB_DNA-db_1     | Centromere protein Cenp-B, DNA-binding domain 1                                   | HTH-RP1       |
| IPR006734 | DUF597                        | Protein of unknown function DUF597                                                |               |
| IPR006754 | Poxvirus_I3_ssDNA-bd          | Poxvirus I3 ssDNA-binding                                                         |               |
| IPR006779 | S1FA_DNA-bd                   | DNA binding protein S1FA                                                          | S1FA          |
| IPR006821 | Intermed_filament_DNA-bd      | Intermediate filament head, DNA-binding domain                                    |               |
| IPR006854 | PP_DNA-bd_vir                 | DNA-binding 11kDa phosphoprotein                                                  |               |
| IPR006856 | MAT_alpha1                    | Mating-type protein MAT alpha 1                                                   | MAT           |
| IPR006861 | HABP4_PAIRBP1-bd              | Hyaluronan/mRNA-binding protein                                                   |               |
| IPR006871 | ssDNA-bd_baculovirus          | ssDNA-binding protein, baculovirus                                                |               |
| IPR006895 | Znf_Sec23_Sec24               | Zinc finger, Sec23/Sec24-type                                                     |               |
| IPR006923 | Baculo_LEF5_N                 | Baculoviridae late expression factor 5, N-terminal                                |               |
| IPR006957 | EIN3                          | Ethylene insensitive 3                                                            | EIN3          |
| IPR007010 | PoIA_pol_RNA-bd_dom           | Poly(A) polymerase, RNA-binding domain                                            |               |
| IPR007031 | Poxvirus_VLTF3                | Poxvirus VLTF3, late transcription factor                                         |               |
| IPR007050 | Tscrpt_reg_HTH_bacterio-opsin | Transcription regulator HTH, bacterio-opsin                                       |               |
| IPR007147 | DUF352                        | Protein of unknown function DUF352                                                |               |
| IPR007219 | Transcription_factor_fun      | Transcription factor, fungi                                                       | ZNF-C6        |
| IPR007264 | H/ACA_rnp_Nop10               | H/ACA ribonucleoprotein complex, subunit Nop10                                    |               |
| IPR007281 | Mre11_DNA-bd                  | Mre11, DNA-binding                                                                |               |
| IPR007492 | LytTR_DNA-bd_dom              | LytTr, DNA-binding domain                                                         | HTH-winged    |
| IPR007504 | H/ACA_rnp_Gar1/Naf1           | H/ACA ribonucleoprotein complex, subunit Gar1/Naf1                                |               |
| IPR007527 | Znf_SWIM                      | Zinc finger, SWIM-type                                                            | ZNF-SWIM      |
| IPR007529 | Znf_HIT                       | Zinc finger, HIT-type                                                             |               |
| IPR007532 | Poxvirus_early-TF_Isu         | Poxvirus early transcription factor, large subunit                                |               |
| IPR007586 | VP8_pox_nuc-bd                | Poxvirus VP8/L4R, nucleic acid binding                                            |               |
| IPR007588 | Znf_FLYWCH                    | Zinc finger, FLYWCH-type                                                          |               |
| IPR007591 | SSDP_ss-bd                    | Single-stranded DNA-binding protein, SSDP                                         |               |
| IPR007634 | RNA_pol_sigma_54_DNA-bd       | RNA polymerase sigma factor 54, DNA-binding                                       |               |
| IPR007638 | Gln-tRNA-synth Ib_RNA-bd_2    | Glutaminyl-tRNA synthetase, class Ib, non-specific RNA-binding domain 2           |               |
| IPR007639 | Gln-tRNA-synth Ib_RNA-bd_N    | Glutaminyl-tRNA synthetase, class Ib, non-specific RNA-binding domain, N-terminal |               |
| IPR007684 | Znf_Ogr/Delta                 | Zinc finger, Ogr/Delta-type                                                       | ZNF-Ogr/Delta |
| IPR007737 | Mga                           | M trans-acting positive regulator                                                 |               |
| IPR007853 | Znf_DNL-typ                   | Zinc finger, DNL-type                                                             |               |



|           |                                |                                                                |                |
|-----------|--------------------------------|----------------------------------------------------------------|----------------|
| IPR007872 | Znf_DHP                        | Zinc finger, DPH-type                                          |                |
| IPR007900 | TAF4                           | Transcription initiation factor TFIID component TAF4           |                |
| IPR007911 | Flagellar_FlhD_dom             | Flagellar transcriptional activator FlhD, domain               | Flh            |
| IPR007933 | Transcript_activ_CII           | Transcription activator CII                                    |                |
| IPR007944 | FlhC                           | Flagellar transcriptional activator FlhC                       | Flh            |
| IPR007991 | RNA_pol_I_trans_ini_fac_RRN3   | RNA polymerase I specific transcription initiation factor RRN3 |                |
| IPR008336 | Topol_DNA-bd_euk               | DNA topoisomerase I, DNA binding, eukaryotic-type              |                |
| IPR008395 | Agenet                         | Agenet                                                         |                |
| IPR008648 | Herpes_UL69                    | Herpesvirus transcriptional regulator                          |                |
| IPR008705 | Nanos/Xcat2                    | Nanos/Xcat2                                                    |                |
| IPR008789 | Poxvirus_intermed-TF           | Poxvirus intermediate transcription factor                     |                |
| IPR008807 | ROS_MUCR                       | ROSMUCR transcriptional regulator                              |                |
| IPR008851 | TFIIF-alpha                    | Transcription initiation factor IIF, alpha subunit             |                |
| IPR008891 | Viral_NABP                     | Viral nucleic acid binding                                     |                |
| IPR008913 | Znf_CHY                        | Zinc finger, CHY-type                                          | ZNF-CHY        |
| IPR009067 | TAF_II_230-bd                  | TAFII-230 TBP-binding                                          |                |
| IPR009349 | Znf_C2HC5                      | Zinc finger, C2HC5-type                                        |                |
| IPR009400 | Nuc_excision_repair_TFIH_TTDA  | Nucleotide excision repair, TFIH, subunit TTDA                 |                |
| IPR009429 | Baculo_LEF-11                  | Baculovirus LEF-11                                             |                |
| IPR009718 | Rex_DNA-bd_C                   | Rex DNA-binding, C-terminal                                    |                |
| IPR010078 | PurR_Bsub                      | Pur operon repressor                                           |                |
| IPR010113 | Nif-specific_regulatory_prot   | Nif-specific regulatory protein                                |                |
| IPR010211 | Redox-sen_tscrpt-act_SoxR      | Redox-sensitive transcriptional activator SoxR                 | HTH-MerR       |
| IPR010242 | TF_HTH_IscR                    | Transcription factor HTH, IscR                                 | HTH-IscR       |
| IPR010248 | His_ut_repres                  | Histidine utilization repressor                                |                |
| IPR010507 | Znf_MYM                        | Zinc finger, MYM-type                                          |                |
| IPR010525 | Auxin_resp                     | Auxin response factor                                          | ARF            |
| IPR010603 | Znf_CppX_C4                    | Zinc finger, ClpX C4-type                                      |                |
| IPR010663 | Znf_DNA_glyclase/IsotRNA_synth | Zinc finger, DNA glycosylase/AP lyase/soleucyl tRNA synthetase |                |
| IPR010684 | RNA_pol_II_trans_fac_SIII_A    | RNA polymerase II transcription factor SIII, subunit A         |                |
| IPR010712 | Arsenical-R_ArsD               | Arsenical-resistance operon trans-acting repressor ArsD        |                |
| IPR010744 | Phage_CI_repr                  | Bacteriophage CI repressor                                     |                |
| IPR010863 | DUF1495                        | Protein of unknown function DUF1495                            |                |
| IPR010921 | Trp_repressor/repl_initiator   | Trp repressor/replication initiator                            | TrpR           |
| IPR010985 | Ribbon_hlx_hlx                 | Ribbon-helix-helix                                             | Ribbon-hlx-hlx |
| IPR010995 | DNA_repair_Rad51/TF_NusA_a-hlx | DNA repair Rad51/transcription factor NusA, alpha-helical      |                |
| IPR011113 | Rho_RNA-bd                     | Rho termination factor, RNA-binding                            |                |
| IPR011124 | Znf_CW                         | Zinc finger, CW-type                                           | ZNF-CW         |
| IPR011399 | NosR                           | Nitrous oxide reductase expression regulator NosR              |                |
| IPR011564 | Telomer_end-bd                 | Telomere end binding protein                                   |                |
| IPR011660 | PSK_trans_fac                  | Rv0623-like transcription factor                               |                |
| IPR011722 | Hemimethylated_DNA-bd_dom      | Hemimethylated DNA-binding domain                              |                |
| IPR011789 | CueR                           | Cu(II)-responsive transcriptional regulator                    | HTH-MerR       |
| IPR011794 | MerR                           | Hg(II)-responsive transcriptional regulator                    |                |
| IPR011797 | MerD                           | Mercuric resistance transcriptional repressor protein MerD     |                |

|           |                                |                                                                                                   |                      |
|-----------|--------------------------------|---------------------------------------------------------------------------------------------------|----------------------|
| IPR011879 | Sig_transdc_resp-reg_PhoB      | Signal transduction response regulator, phosphate regulon transcriptional regulatory protein PhoB | HTH-winged           |
| IPR011991 | WHTH_trnsnscr_rep_DNA-bd       | Winged helix-turn-helix transcription repressor DNA-binding                                       |                      |
| IPR012052 | Spore_0_A                      | Sporulation stage 0, transcription factor Spo0A                                                   |                      |
| IPR012318 | HTH_CRP_2                      | Helix-turn-helix motif, Crp-type                                                                  | HTH-Crp              |
| IPR012339 | Phage_T4_Gp32_ssDNA-bd         | Bacteriophage T4, Gp32, single-stranded DNA-binding                                               |                      |
| IPR012704 | Sig_transdc_resp-reg_PrpR      | Signal transduction response regulator, propionate catabolism, transcriptional regulator PrpR     | HTH-Fis              |
| IPR012712 | HpaR                           | Homoprotocatechuate degradation transcriptional regulator HpaR                                    |                      |
| IPR012771 | Trehalos_R_gpbac               | Trehalose operon repressor                                                                        | HTH-Lambda repressor |
| IPR012781 | Fruct_sucro_rep                | D-fructose-responsive transcription factor                                                        | HTH-Lambda repressor |
| IPR012787 | TF_PcaQ                        | Pca transcription factor PcaQ                                                                     |                      |
| IPR012794 | PcaR_PcaU                      | Beta-ketoadipate transcriptional regulator, PcaR/PcaU/PobR                                        |                      |
| IPR012900 | MFMR                           | G-box binding, MFMR                                                                               | bZIP                 |
| IPR012906 | PaaX-like_N                    | PaaX-like, N-terminal                                                                             |                      |
| IPR012909 | PHA_DNA-bd_N                   | PHA accumulation regulator DNA-binding, N-terminal                                                |                      |
| IPR012934 | Znf_AD                         | Zinc finger, AD-type                                                                              | ZNF-AD               |
| IPR012935 | Znf_C3HC-like                  | Zinc finger, C3HC-like                                                                            |                      |
| IPR012940 | NABP                           | Nucleic acid binding NABP                                                                         |                      |
| IPR012996 | Znf_CHHC                       | Zinc finger, CHHC-type                                                                            |                      |
| IPR013085 | Znf_U1-C                       | Zinc finger, U1-C type                                                                            | ZNF-C2H2             |
| IPR013150 | TFIIB_cyclin                   | Transcription factor TFIIB, cyclin-related                                                        |                      |
| IPR013159 | DnaA_C                         | Chromosomal replication initiator, DnaA C-terminal                                                |                      |
| IPR013192 | Znf_HCV_NS5a                   | Zinc finger, hepatitis C virus non-structural 5a-type                                             |                      |
| IPR013195 | Hepatitis_B_virus_capsid_N     | Hepatitis B virus, capsid N-terminal                                                              |                      |
| IPR013196 | HTH_11                         | Helix-turn-helix, type 11                                                                         | HTH-winged           |
| IPR013198 | GTP_sensing_HTH_CodY_C         | GTP-sensing helix-turn-helix, CodY, C-terminal                                                    |                      |
| IPR013199 | HTH_Mga_DNA-bd                 | Helix-turn-helix Mga, DNA-binding trans-acting positive regulator                                 |                      |
| IPR013321 | Arc_rbn_hlx_hlx                | Arc-type ribbon-helix-helix                                                                       | Ribbon-hlx-hlx       |
| IPR013503 | Circadian_KaiC                 | Circadian clock, KaiC                                                                             |                      |
| IPR013699 | Signal_recog_part_SRP72_RNA-bd | Signal recognition particle, SRP72 subunit, RNA-binding                                           |                      |
| IPR013741 | Tscrpt_rep_KorB                | Transcriptional repressor protein, KorB                                                           |                      |
| IPR013742 | Plant_TF                       | Plant transcription factor                                                                        | ssDNA-binding        |
| IPR013910 | TF_PAP1                        | Transcription factor PAP1                                                                         | bZIP                 |
| IPR013921 | Mediator_Med20                 | Mediator complex, subunit Med20                                                                   |                      |
| IPR013927 | TF_Opi1                        | Transcription factor Opi1                                                                         |                      |
| IPR013972 | YcbB                           | YcbB domain                                                                                       |                      |
| IPR014048 | MethylDNA_cys_MeTrfase_DNA-bd  | Methylated-DNA-[protein]-cysteine S-methyltransferase, DNA binding                                | HTH-winged           |
| IPR014071 | Cu_transp_CopY/TcrY            | Copper transport repressor CopY/TcrY                                                              |                      |
| IPR014091 | Tscrpt_rep_PHB_PhaQ            | Transcriptional repressor poly-beta-hydroxybutyrate-responsive                                    |                      |
| IPR014154 | GTP_sensing_CodY               | GTP-sensing transcriptional pleiotropic repressor CodY                                            |                      |
| IPR014160 | Nickel_NikR_proteobac          | Nickel-responsive transcriptional regulator NikR, proteobacteria                                  | Ribbon-hlx-hlx       |

|           |                                 |                                                                                    |                |
|-----------|---------------------------------|------------------------------------------------------------------------------------|----------------|
| IPR014178 | FA-response_TF_FadR             | Fatty acid response transcription factor FadR                                      | HTH-winged     |
| IPR014208 | Spore_III_D                     | Sporulation stage III, transcriptional regulator SpoIIID                           |                |
| IPR014243 | DNA_bind_RsfA                   | Transcription factor, RsfA                                                         |                |
| IPR014264 | Sig_transdc_resp-reg_PEP-CTERM  | Signal transduction response regulator, PEP-CTERM system, putative                 |                |
| IPR014317 | Transcription_activator_PspF    | Transcription activator PspF                                                       | HTH-Fis        |
| IPR014466 | Txn_rg_UCP012876                | Predicted transcriptional regulator, AF1742 type                                   |                |
| IPR014476 | ESCAROLA                        | Predicted AT-hook DNA-binding                                                      |                |
| IPR014601 | UCP036158_DNA-bd                | Uncharacterised conserved protein UCP036158, DNA-binding                           |                |
| IPR014789 | PolyA-riboNase_RNA_binding      | Poly(A)-specific ribonuclease, RNA-binding                                         |                |
| IPR014842 | AFT                             | Transcription factor AFT                                                           |                |
| IPR014855 | NOZZLE                          | Plant transcription factor NOZZLE                                                  | NOZZLE         |
| IPR014875 | Mor_transcription_activator     | Mor transcription activator                                                        |                |
| IPR014876 | DEK_C                           | DEK, C-terminal                                                                    |                |
| IPR014884 | ParB_fam_C                      | ParB protein family, C-terminal                                                    |                |
| IPR014886 | RRM_3                           | RNA-binding motif                                                                  |                |
| IPR015088 | Znf_DNA-dir_DNA_pol_B_alpha     | Zinc finger, DNA-directed DNA polymerase, family B, alpha                          |                |
| IPR015126 | Mu_I-gamma                      | Mu DNA binding, I gamma subdomain                                                  |                |
| IPR015189 | Elong_fac_SelB-wing-hlx_typ-1   | Translation elongation factor SelB, winged helix, type 1                           |                |
| IPR015191 | Elong_fac_SelB-wing-hlx_typ-3   | Translation elongation factor SelB, winged helix, type 3                           |                |
| IPR015195 | SLIDE                           | SLIDE                                                                              |                |
| IPR015198 | Phage_T4_MotA_Tschrpt_reg_N     | Bacteriophage T4, MotA, transcription regulator N-terminal                         |                |
| IPR015241 | Phage_T4_MotA_Tschrpt_reg_C     | Bacteriophage T4, MotA, transcription regulator C-terminal                         |                |
| IPR015265 | PuR_N                           | Bacterial purine repressor, N-terminal                                             |                |
| IPR015280 | Rap1-DNA-bind                   | Rap1, DNA-binding                                                                  |                |
| IPR015285 | RIO2_kinase_winged_hlx_N        | RIO2 kinase, winged helix, N-terminal                                              |                |
| IPR015358 | Tschrpt_reg_MerR_DNA-bd         | Transcription regulator MerR, DNA binding                                          | HTH-MerR       |
| IPR015367 | Trans_fact_CEP1_DNA-bd          | Transcription factor CEP-1, DNA-binding domain                                     | p53            |
| IPR015408 | Znf_Mcm10/DnaG                  | Zinc finger, Mcm10/DnaG-type                                                       |                |
| IPR015419 | EKC/KEOPS_Pcc1                  | EKC/KEOPS complex, subunit Pcc1                                                    |                |
| IPR015848 | PNPase_PH_RNA-bd_bac/org-type   | Polynucleotide phosphorylase, phosphorolytic RNA-binding, bacterial/organelle-type |                |
| IPR015871 | TFIIA_gsu_C                     | Transcription initiation factor IIA, gamma subunit, C-terminal                     |                |
| IPR015872 | TFIIA_gsu_N                     | Transcription initiation factor IIA, gamma subunit, N-terminal                     |                |
| IPR016032 | Sig_transdc_resp-reg_C-effector | Signal transduction response regulator, C-terminal effector                        | HTH-winged     |
| IPR016221 | Bifunct_regulatory_prot_Ada     | Bifunctional regulatory protein Ada                                                |                |
| IPR016310 | Transcription_factor_GAMYB      | Transcription factor, GAMYB                                                        | MYB            |
| IPR016312 | TF_GA-bd_asu                    | Transcription factor, GA-binding, alpha subunit                                    | GA-bd          |
| IPR016325 | Transcrt_activator_MAT_Alpha1   | Transcription activator, mating-type protein ALPHA1                                |                |
| IPR016490 | Tschrpt_reg_HTH_AF0396-typ3     | Transcriptional regulator, HTH, AF0396-type                                        |                |
| IPR016586 | Mt_TF_B                         | Mitochondrial transcription factor mtTFB                                           |                |
| IPR016634 | Tschrpt_reg_DeoR_prd            | Transcription regulator, DeoR, predicted                                           |                |
| IPR016723 | Tschrpt_reg_ArsR_prd            | Transcription regulator, ArsR, predicted                                           |                |
| IPR016748 | Tschrpt_reg_CopG_prd            | Transcription regulator, CopG/Arc/MetJ DNA-binding domain-containing, predicted    | Ribbon-hlx-hlx |

|           |                                |                                                                                    |            |
|-----------|--------------------------------|------------------------------------------------------------------------------------|------------|
| IPR016766 | Tscrpt_reg_Tri6                | Transcription regulator Tri6                                                       |            |
| IPR016827 | Transcriptional_adaptor_2      | Transcriptional adaptor 2                                                          | MYB        |
| IPR016908 | UCP029037                      | Uncharacterised conserved protein UCP029037                                        |            |
| IPR016943 | UCP030050_HTH                  | Uncharacterised conserved protein UCP030050, HTH transcriptional regulator, BH1869 |            |
| IPR016981 | Tscrpt_reg_031684_prd          | Transcription regulator, AraC, predicted                                           |            |
| IPR016998 | Tscrpt_reg_HTH_Rot             | Transcription regulator HTH, Rot                                                   |            |
| IPR017053 | Response_reg_B-typ_pln         | Response regulator, plant B-type                                                   | MYB        |
| IPR017125 | Znf_PRDM5                      | PR-domain zinc finger protein PRDM5                                                | ZNF-C2H2   |
| IPR017158 | Tscrpt-reg_CBS-contain_prd     | Transcription regulator, CBS domain-containing, predicted                          |            |
| IPR017174 | TFIIIB_Bdp1_fun                | Transcription factor IIIB, Bdp1 subunit, fungi                                     |            |
| IPR017185 | UCP037373_trxn_reg             | Uncharacterised conserved protein UCP037373, transcriptional regulator, AF0674     |            |
| IPR017253 | TF_Sry                         | Transcription factor Sry                                                           |            |
| IPR017271 | Tscrpt_reg_HTH_MJ1545_prd      | Transcription regulator HTH, MJ1545, predicted                                     | HTH-MJ1545 |
| IPR017275 | Transcription_factor_FapR      | Transcription factor FapR                                                          |            |
| IPR017386 | SOX-12/11/4a                   | SOX-12/11/4a                                                                       |            |
| IPR017392 | Pathogen-transcript_activator  | Pathogenesis-related genes transcriptional activator PTI6                          |            |
| IPR017396 | TF_WRKY_Ilc                    | Transcription factor, WRKY group Ilc                                               | WRKY       |
| IPR017412 | TF_WRKY_Ile                    | Transcription factor, WRKY group lie                                               | WRKY       |
| IPR017470 | Tscrpt_reg_EpsA                | Transcription regulator EpsA                                                       |            |
| IPR017507 | Tscrpt_reg_HipB-like           | Transcription regulator, HipB-like                                                 |            |
| IPR017685 | Tscrpt_reg_ArgP                | Transcription regulator ArgP                                                       | HTH-winged |
| IPR017722 | Tscrpt_reg_PhnR                | Transcription regulator PhnR                                                       |            |
| IPR017723 | Tscrpt_reg_AEP_util-assoc      | Transcription regulator, 2-aminoethylphosphonate utilisation-associated            |            |
| IPR017724 | Tscrpt_reg_AEP_util-assoc_LysR | Transcription regulator, aminoethylphosphonate utilisation-associated, LysR-type   |            |
| IPR017757 | Tscrpt_rep_Betl                | Transcriptional repressor Betl                                                     | HTH-Tet-R  |
| IPR017786 | TF_choline_sulphate-util_put   | Transcription factor, choline sulphate-utilisation, putative                       |            |
| IPR017799 | Tscrpt_reg_PadR_acidobac-type  | Transcription regulator PadR, acidobacterial-type                                  |            |
| IPR018539 | RNA-bd_mt                      | RNA-binding, mitochondrial                                                         |            |
| IPR018586 | Brinker_DNA-bd                 | Brinker DNA-binding domain                                                         |            |
| IPR018652 | DUF2082_NA-bd_Znr              | Protein of unknown function DUF2082, nucleic-acid-binding, Zn-ribbon               |            |
| IPR018783 | TF_enhancer_of_yellow_2        | Transcription factor, enhancer of yellow 2                                         |            |
| IPR018792 | Nuclear_phosphoprot_p8_DNA-bd  | Nuclear phosphoprotein p8, DNA binding                                             |            |
| IPR018834 | Telomere_elong_Est1_DNA-bd     | Telomere elongation protein Est1, DNA-binding                                      |            |
| IPR018837 | TF_CRF1                        | Transcription factor CRF1                                                          |            |
| IPR018845 | Initiator_binding_domain       | Initiator binding domain                                                           |            |
| IPR018866 | Znf-4CXXC_R1                   | Zinc-finger domain of monoamine-oxidase A repressor R1                             |            |
| IPR018967 | FeS-contain_CDGSH-typ          | Iron sulphur-containing domain, CDGSH-type                                         |            |
| IPR019136 | TF_IIIC_su-5                   | Transcription factor IIIC, subunit 5                                               |            |
| IPR019139 | Leu-rich_rep_flightless-int_pr | Leucine-rich repeat flightless-interacting protein                                 |            |
| IPR019145 | Mediator_Med10                 | Mediator complex, subunit Med10                                                    |            |
| IPR019298 | Nucleotide-bd_PIN_domain       | Nucleotide-binding protein, PIN domain-containing                                  |            |
| IPR019300 | RNA-binding_protein_predicted  | RNA-binding protein, predicted                                                     |            |
| IPR019302 | TIR-like_dom                   | Nucleotide-binding protein, predicted, TIR-like domain                             |            |
| IPR019350 | RNA_pol_I-sp_TIF_RRN6-like     | RNA polymerase I-specific transcription initiation                                 |            |

|           |                              |                                                                    |            |
|-----------|------------------------------|--------------------------------------------------------------------|------------|
|           |                              | factor RRN6-like                                                   |            |
| IPR019385 | PHAX_RNA-binding_domain      | Phosphorylated adapter RNA export protein, RNA-binding domain      |            |
| IPR019401 | Znf_CHCC                     | Zinc finger, CHCC-type                                             |            |
| IPR019447 | DNA/RNA-bd_Kin17_cons_domain | DNA/RNA-binding protein Kin17, conserved domain                    |            |
| IPR019473 | TFIID_su8_C                  | Transcription factor TFIID, subunit 8, C-terminal                  |            |
| IPR019476 | T4SS_TraD_DNA-bd             | Type IV secretion system, TraD, DNA-binding domain                 |            |
| IPR019485 | Znf_VDJ_recomb-activ_1       | Zinc finger, V(D)J recombination-activating protein 1              | ZNF-C2H2   |
| IPR019499 | Val-tRNA_synth_la_tRNA-bd    | Valyl-tRNA synthetase, class Ia, tRNA-binding arm                  |            |
| IPR019525 | Nrf1_NLS/DNA-bd_dimer        | Nuclear respiratory factor 1, NLS/DNA-binding, dimerisation domain |            |
| IPR019581 | Prp8_U5-snRNA-bd             | Pre-mRNA-processing-splicing factor 8, U5-snRNA-binding            |            |
| IPR019622 | RNA_pol_I_RRN9               | RNA polymerase I specific transcription initiation factor, RRN9    |            |
| IPR020189 | Transl_elong_IF5A_C          | Translation elongation factor, IF5A C-terminal                     |            |
| IPR020783 | Ribosomal_L11_C              | Ribosomal protein L11, C-terminal                                  |            |
| IPR020900 | Arg_repress_DNA-bd           | Arginine repressor, DNA-binding domain                             | HTH-winged |
| IPR021009 | Motility_repressor_MogR      | Motility repressor, MogR                                           |            |
| IPR021068 | Uncharacterised_HTH_DNA-bd   | Uncharacterised domain HTH DNA binding domain                      |            |
| IPR021103 | siRNA-bd_Argonaute           | siRNA-binding, Argonaute                                           |            |
| IPR021104 | KfrA_DNA-bd_N                | KfrA, N-terminal DNA-binding domain                                |            |
| IPR021289 | UvsY                         | Recombination, repair and ssDNA binding protein UvsY               |            |
| IPR021418 | THO_THOC2_C                  | THO complex, subunitTHOC2, C-terminal                              |            |
| IPR021600 | TFIIE_asu_C_met              | Transcription factor TFIIE, alpha subunit, C-terminal, metazoa     |            |
| IPR021752 | TF_Rrn7                      | Transcription initiation factor Rrn7                               |            |
| IPR021891 | Telomerase_RBD               | Telomerase ribonucleoprotein complex - RNA-binding domain          |            |
| IPR022056 | CpG-bd_C                     | CpG binding protein, C-terminal                                    |            |
| IPR022097 | TF_SOX                       | Transcription factor SOX                                           |            |
| IPR022129 | Tscript_rep_NocA-like        | Transcriptional repressor NocA-like                                |            |
| IPR022150 | TF_AT-hook                   | Transcription factor, AT-hook-containing                           |            |
| IPR022666 | Rbsml_prot_L2_RNA-bd_dom     | Ribosomal Proteins L2, RNA binding domain                          |            |
| IPR022687 | Fe_dep_repressor_HTH_DtxR_N  | Iron dependent repressor, N-terminal                               | HTH-winged |
| IPR022783 | GCFC_dom                     | GC-rich sequence DNA-binding factor domain                         |            |
| IPR023558 | Trp_RNA-bd_attenuator_dom    | Tryptophan RNA-binding attenuator protein domain                   |            |
| IPR004883 | LOB                          | Lateral organ boundaries, LOB                                      | LOB        |
| IPR017877 | Myb-like_dom                 | Myb-like domain                                                    | MYB        |
| IPR008540 | BZR1                         | BZR1, transcriptional repressor                                    | BZR        |
| IPR026489 | CXC_dom                      | CXC domain                                                         | CXC        |
| IPR003035 | RWP-RK_dom                   | RWP-RK domain                                                      | RWP-RK     |
| IPR007592 | DUF573                       | Protein of unknown function DUF573                                 | DUF573     |
| IPR010409 | GAGA-bd                      | GAGA binding-like                                                  | GAGA       |
| IPR014977 | WRC                          | WRC                                                                | WRC        |
| IPR007818 | DUF702                       | Protein of unknown function DUF702                                 | DUF702     |

**Supplemental Table 5. TF classification.**

Classification of TFs into families based on DBDs from Interpro database (Zdobnov and Apweiler 2001; Hunter, Jones et al. 2012).
