# Supplementary material
Source: PubMed Central journal article supplement (PMC4012575)
Supplement: supp_pp.114.235903_235903Supplemental_figures.pdf [file supp_pp.114.235903_235903Supplemental_figures.pdf]

1 **Supplemental figures:**

2

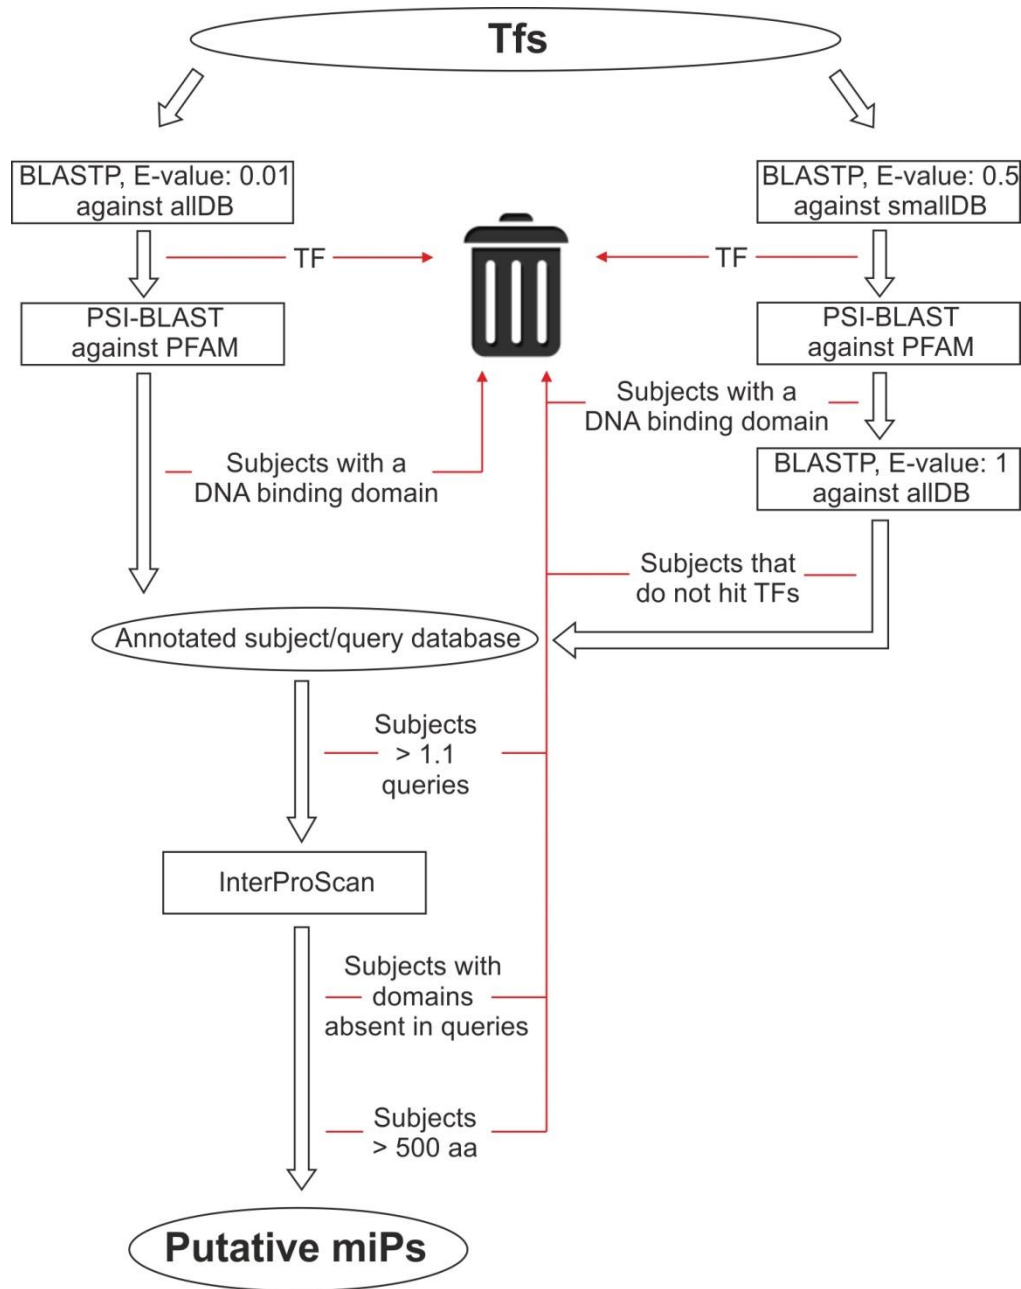

3

4

5 **Supplemental Figure 1. Flow chart of the algorithm used to predict miPs.**

6 Ovals, rectangles, and red lines represent protein databases, software processes, and filters.  
7 allDB, database comprising all proteins in a genome. smallDB, database comprising proteins  
8 shorter than 200 amino acids in a genome.

9

**Target TF (prey)**

***Arabidopsis thaliana***

| Domains               | miPs (bait)      | AT4G36870 | AT3G01470 | AT5G60690 | AT4G25530/FWA | AT3G18380 | AT3G19510 | AT1G75240 |
|-----------------------|------------------|-----------|-----------|-----------|---------------|-----------|-----------|-----------|
| KNOX1, KNOX2          | KNATM/At1g14760  | +++       |           |           |               |           |           |           |
| /                     | AT1G20280        |           | -         |           |               |           |           |           |
| /                     | AT1G61200        |           | -         |           |               |           |           |           |
| Leucine zipper        | ZPRII/AT3G60890  |           |           | ++        |               |           |           |           |
| Leucine zipper        | ZPRIII/AT3G52770 |           |           | +++       |               |           |           |           |
| START, Leucine zipper | SPPR/AT4G26920   |           |           |           | +++           |           |           |           |
| SWADEE                | AT4G25330        |           |           |           |               | -         |           |           |
| SWADEE                | AT1G15215        |           |           |           |               | +         |           |           |
| ZN finger             | AT3G19530        |           |           |           |               |           | -         |           |
| ZN finger             | AT3G19550        |           |           |           |               |           |           | ++        |

**Y2H**

**Target TF (prey)**

***Cenorhabditis elegans***

| Domains | miPs (bait)  | F31E3.1/CEH20 | F17A2.5/CEH40 | F22A3.5/CEH60 |
|---------|--------------|---------------|---------------|---------------|
| MEINOX  | PSA3/F39D8.2 | +++           | -             | -             |

**Y2H**

1  
2  
3  
4  
5  
6  
7  
8  
9

**Supplemental Figure 2. Protein-protein interactions between putative miPs and their predicted target HD TFs from *A. thaliana* and *C. elegans*.**

Interactions between miPs (bait) and target TFs (prey) were assessed by yeast two-hybrid (Y2H) using the lacZ reporter gene. Strong (+++), medium (++), mild (+), and no interactions (-) indicate strength of interaction. The predicted miP domains are listed on the left of each miP.

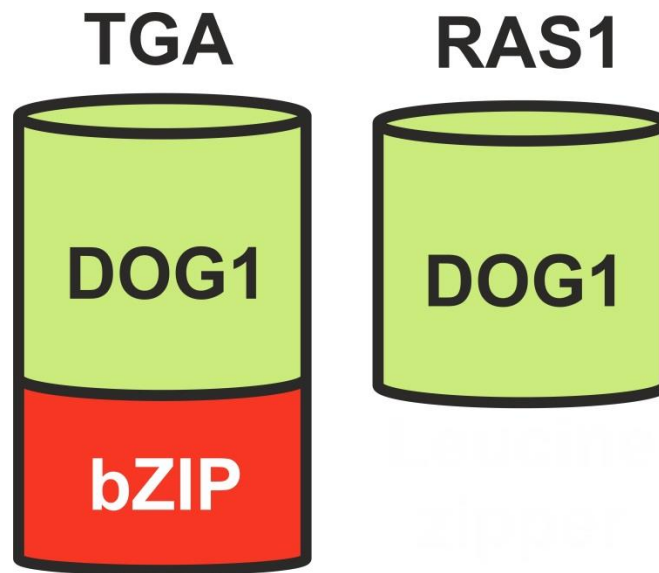

1

2

3 **Supplemental Figure 3. Scheme of TGA and RAS1.**

4 DOG1, DELAYED IN GERMINATION 1 domain; bZIP, basic domain leucine zipper.

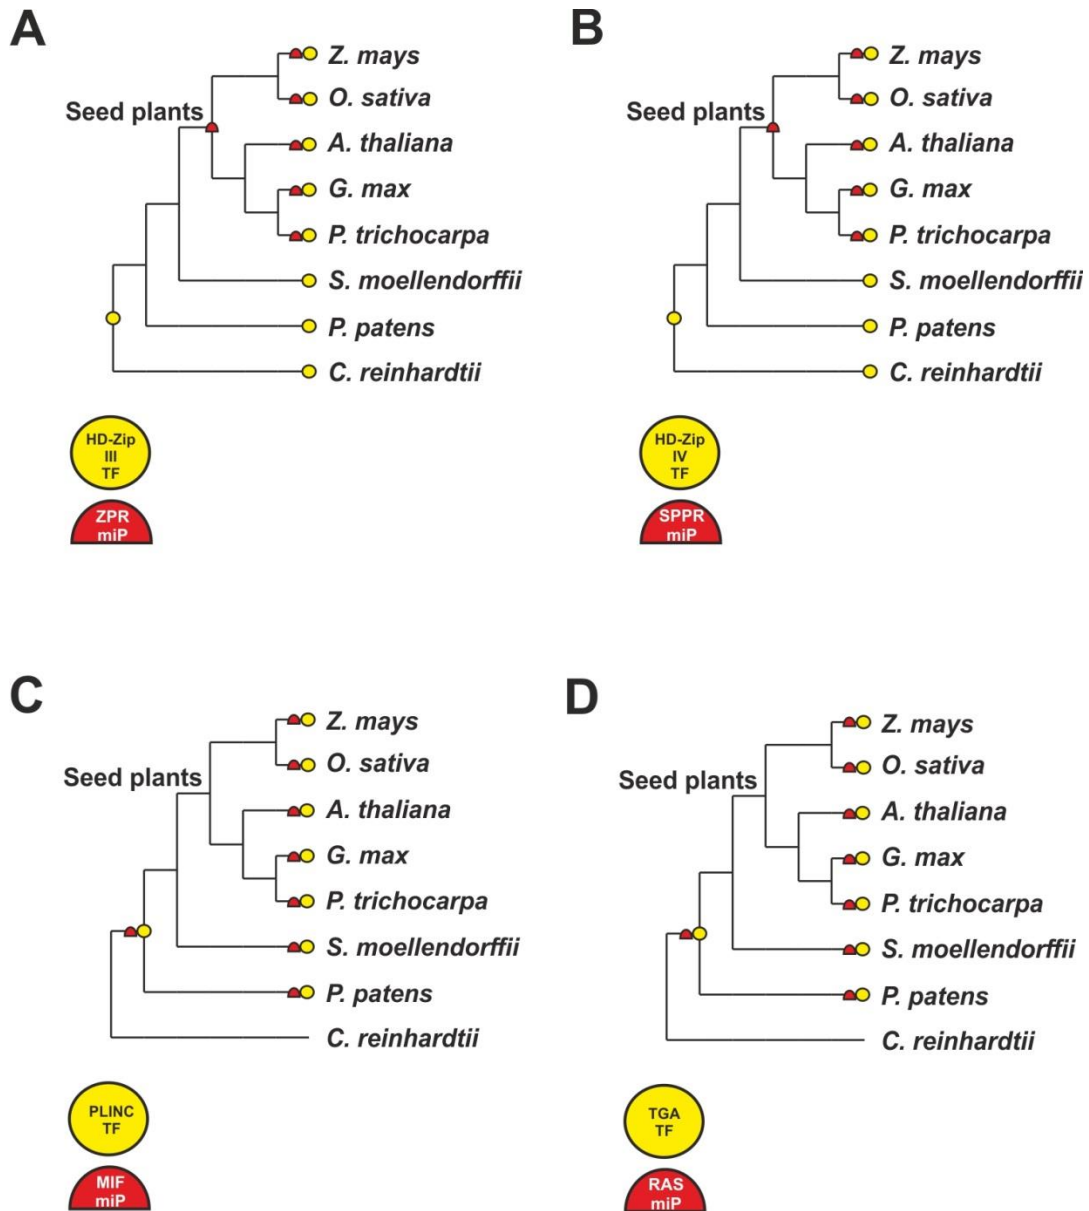

1

2

3 **Supplemental Figure 4. Phylogenetic analyses of miPs in plants.**

4 Phylogenetic distribution of miPs (red semi-circles) and their TF targets (yellow circles). (A)

5 ZPR and HD-Zip III. (B) SPPR and HD-ZipIV. (C) MIF and PLINC HD-Zinc finger. (D) RAS

6 and TGA.
